1 **Beyond the medical file: a scoping review on patients' perspectives on guideline-oriented**  
2 **depression treatment in primary care**

3 Biersack, Katharina<sup>1</sup>, Sattel, Heribert<sup>1</sup>, Schönweger, Petra<sup>2,3</sup>, Kaspar, Lea<sup>1</sup>, Lehnen, Nadine<sup>1</sup>,  
4 Gensichen, Jochen<sup>4</sup>, Henningsen, Peter<sup>1</sup>

5 for the POKAL group\*

6

7 1 Department of Psychosomatic Medicine and Psychotherapy, University Hospital of Technical University of Munich,  
8 Germany

9 2 Institute of Medical Information Processing, Biometry, and Epidemiology – IBE, Chair of Public Health and Health Services  
10 Research, Munich, Germany

11 3 Pettenkofer School of Public Health, Munich, Germany

12 4 Institute of General Practice and Family Medicine, University Hospital of Ludwig-Maximilian-University Munich, Germany

13

14 Corresponding author at Katharina Biersack, Langerstr. 3, 81667 Munich, Germany,

15 +498941409239, [katharina.biersack@mri.tum.de](mailto:katharina.biersack@mri.tum.de)

16

17 **Abstract**

18 **Objectives:** Depressive disorders are common in the primary care setting. Primary care practitioners  
19 must deal with different disorders and keep up with evidence-based treatment. Clinical practice  
20 guidelines (CPG) offer accessible information about up-to-date care but are poorly implemented.  
21 Research on the implementation of CPGs has focused on the practitioners' perspective but has  
22 neglected the patients' perspective largely.

23 This scoping review aimed to identify terms related to the concept of ‘patients’ perspectives on  
24 depression treatment in primary care building a comprehensive framework and to identify  
25 researched barriers and facilitators to partaking in care.

26 **Methods:** We conducted a scoping review on Medline and Psycinfo. Eligible publications contained  
27 information from the patients’ point of view on depression treatment in primary care in OECD  
28 member states. We used the PCC-framework to obtain inclusion criteria. Publications until August  
29 2nd 2023 were considered.

30 **Results:** We included 232 publications. Current literature focuses on behavioral and easily collected  
31 measures like satisfaction and on patient-sided barriers and facilitators to adherence. Other  
32 treatment-related behaviors are less researched. Patients often report exclusively or mainly physical  
33 symptoms in their visits which can impede diagnosis.

34 **Conclusion:** This review provides a comprehensive framework for the concept. Research on the  
35 patients’ perspective on depression treatment in primary care is still inconclusive.

36 **Registration:** This review is registered via OSF (<https://osf.io/p9rnc>).

37 Keywords: scoping review, clinical practice guideline, primary care, depression, patient perspective

38

39

## 40 **1. Introduction**

41 Depressive disorders are very common in the community and often reason for disability and  
42 absenteeism [1,2]. Undetected and inadequately treated cases of depression are a burden to  
43 patients, health system, and society [3]. Most patients are not seen and treated in specialist care but  
44 at the office of their local GP [2]. Still, depression is often undiagnosed and, even after diagnosis, still  
45 untreated [4]. To this day, the reasons for these gaps are not completely clear, nor are there tailored  
46 and effective strategies.

47 Clinical practice guidelines (CPGs) have long been used to bridge the gap between best practice and  
48 real-world primary care. Most high and middle-income countries have national guidelines for  
49 depression treatment, developed by specialists and stakeholders [5]. However, many guidelines are  
50 not adequately implemented in primary care settings over long periods of time [6]. Despite their aim  
51 of improving accessibility to information and effective treatment strategies, CPGs face  
52 implementation challenges.

53 Primary care professionals deal with a wide range of disorders and must stay updated on numerous  
54 CPGs. As a result, not all guidelines are equally known and implemented. This can be attributed, in  
55 part, to guidelines themselves, as only a few provide effective implementation guidance. For  
56 example, the German national CPG for depression treatment mentions “implementation” only twice  
57 in its 257 pages with no clear guidance on the topic [7]. A systematic review by Lee et al. in 2020  
58 concluded that so far guideline implementation is inadequately planned, reported, and measured  
59 globally [8].

60 On the practitioners’ side, barriers naturally emerge when striving for evidence-based treatment for  
61 all patients and disorders in primary care. Barriers to CPG usage in primary care, such as lack of  
62 education or limited consultation time, have been a subject of interest and research among clinicians  
63 and stakeholders [9]. A recent simulation study revealed that primary care professionals would  
64 require more than 26 hours per day to implement, use, and document according to all current CPGs.  
65 1.6 hours would be solely dedicated to mood disorders [10].

66 To improve the implementation of evidence-based treatment for depressed patients in primary care,  
67 various reviews highlight systemic problems requiring large-scale policies [8,9,11]. However, it takes  
68 considerable time before these policies effectively enhance patient care. In the meantime, research  
69 should focus on identifying gaps and exploring alternative approaches to aid implementation.

70 One significant gap lies in understanding patients’ perspectives on treatment. Patient-reported and -  
71 relevant outcomes are a topic of growing interest as patient-centered care is required to decide what

72 is meaningful and valuable to the individual patient [12]. Patients’ perspectives, their values and  
73 preferences should be considered in the clinical decision-making process [13]. Up to now, patient-  
74 reported outcomes often consist in symptom-related questionnaires but do neglect patients’ point of  
75 view on domains such as satisfaction, expectations and contextual information [14]. Moreover,  
76 patient-relevant outcomes are underrepresented in the current literature despite being important in  
77 the treatment [15]. Currently, there are no frameworks or reviews available on how patients, as key  
78 stakeholders, perceive their care. Just recently, a review emphasized the need for increased patient  
79 participation in guideline development and to date only few guidelines involve patients in the  
80 process [5].

81 Could patients’ perspectives serve as the missing link between evidence and practice? Patients’  
82 experiences with depression treatment in primary care, barriers to help-seeking, and factors  
83 affecting their understanding of and engagement in treatment are vital for effective implementation  
84 strategies. With this scoping review we provide a systematic overview to help guide future research.

85

## 86 **2. Aim**

87 This scoping review aimed at identifying concepts related to ‘patients’ perspectives on primary care’  
88 in a systematic manner, to provide a comprehensive framework with domains and superordinate  
89 domains.

90 Primary aim was to identify the scientific methods and concepts related to patients’ perspectives on  
91 depression treatment in primary care.

92 Secondary we aimed to identify already researched barriers and facilitators towards evidence-based  
93 treatment of depression in primary care.

94

95

96 **3. Methods:**

97 *3.1. Search strategy*

98 We conducted a scoping review searching the databases of Medline and Psycinfo with no limitation  
99 to publication dates up to August 2nd, 2023. By choosing these sources we felt confident to identify  
100 and screen all relevant publications to meet our research goals. We conducted our scoping review in  
101 accordance with the JBI Manual for Evidence Synthesis [16]. We registered the review and gave  
102 details of our method via Open Science Framework (<https://osf.io/p9rnc>).

103

104 *3.2. Inclusion criteria*

105 For the design of our review and the research questions we used the PCC-Framework (population,  
106 context, concept) recommended for scoping reviews by JBI which is applicable for quantitative,  
107 qualitative, and mixed-methods studies [16]. See table 1 for details. For the applied search terms see  
108 appendix 1. We included publications available in English, German, Spanish or French as we felt  
109 confident enough to judge and extract information in these languages.

110

111 Table 1. PCC-Framework.

|            |                                                                                               |
|------------|-----------------------------------------------------------------------------------------------|
| Population | Adult currently clinically depressed patients in OECD member states                           |
| Context    | Primary care as defined by the authors, all available studies                                 |
| Concept    | Patients' perspectives on depression care i.e., their behavior, preconception, and experience |

112

113

114

115        *3.2.1. Population*

116        We included studies with adult persons suffering from depression when being studied. We decided  
117        not to include studies solely on children and adolescents as treatment and needs are very specific  
118        and may be tailored more to age than to the disorder itself. We defined ‘depression’ as an, up-to-  
119        date, ICD or DSM based diagnosis before conducting the review.

120        We changed our approach to defining depression compared to our study protocol. It proved too  
121        exclusive to include only publications with a clear stated definition of the diagnosis of depression, as  
122        many publications included subjects diagnosed by their PCP without further specification. To tackle  
123        our goal to provide a scope to the field we decided to include all studies that stated how they  
124        diagnosed depression. We excluded several qualitative studies on the grounds that they refused to  
125        define depression because it contradicted their approach.

126        If the study included both depressed and dysthymic patients, it was still included for reasons of  
127        practicality. For the same reason, we included studies conducted in patients who were selected  
128        because of an antidepressant prescription if the authors stated that the prescription was for the  
129        treatment of depression and not for some other disorder e.g., anxiety. We also included publications  
130        in which the diagnosis was given by the PCP even if their approach was not clearly stated. We  
131        narrowed the search to OECD-member states for means of comparability of the studied context.

132

133        *3.2.2. Context*

134        Because we were interested in the context of primary care i.e., how patients and other stakeholders  
135        are understanding and using it, we tried to be as inclusive as possible with the concept of primary  
136        care. We selected papers that referred to the setting as ‘primary care’ and defined the setting.  
137        Patients did not necessarily have to be recruited in primary care but had to give information about  
138        their diagnosis or treatment in that context. We included all ambulatory settings meeting our  
139        criteria.

140

141       3.2.3. *Concept*

142       To define the concept of patients' perspectives on care we scoped accessible and recent literature.

143       We decided to include papers that contained information from the patients' own account of their

144       care and had to relate not just to symptomatology but also to the care itself. To find search terms

145       beyond 'perspective' we looked for related topics which we balanced with existing Mesh-terms (See

146       also registration). After finding subcategories for our main concept, we divided these into three

147       conceptual domains: patients' behavior, patients' preconception, and patients' experience.

148

149       3.2.3.1. *Preconception:*

150       We sought to include patients' own concept of depression and treatment and its importance for the

151       beginning and continuity of care. After scoping the literature, we identified various pre-existing

152       concepts describing aspects of the mind related to action e.g., 'attitude', 'belief', 'knowledge', or

153       'expectation'. To bring these different terms and concepts together, we agreed on the term

154       'preconception'. The chosen term points to the idea of conditions preceding the patient-doctor-

155       encounter we were interested in.

156

157       3.2.3.2. *Experience:*

158       To conceptualize terms describing the patients' point of view while in treatment we used the term

159       'Experience'. We included studies in which patients were a distinguishable group and their

160       information added to the concept.

161

162

163 3.2.3.3. *Behavior:*

164 We decided to include behavioral means into our definition of the concept because behavior is  
165 directly related to motivation and can hint to potential barriers and facilitators. It is also easy to  
166 detect and describe from a research point of view. Among the terms we searched for were  
167 ‘consultation’ or ‘help seeking’. To look for patterns of symptom report, we included studies that  
168 used open ended measures to describe the complaints with which patients initially presented. We  
169 excluded studies in which symptoms were given via broad psychometric testing because these  
170 findings tend to be pre-empted by the questionnaires and are not indicative for spontaneous  
171 accounts. We used the search terms ‘symptoms’ and ‘complaints’ for that purpose.

172

173 3.3. *Barriers, facilitators, and subpopulations*

174 The second and third research question did not directly impact the search strategy or PCC-  
175 framework. By defining all above-mentioned concepts as inclusive as possible and as exclusive as  
176 needed we felt comfortable that we included all relevant publications to answer the remaining  
177 questions.

178 We defined ‘barriers and facilitators to depression treatment in primary care from the patients’ point  
179 of view’ as factors that impede or help with therapy-related patient behaviors. We sought to include  
180 all studies using the terms ‘barrier’ or ‘facilitator’ but did not want to exclude relevant papers  
181 researching outcomes falling under our definition which used different terms.

182

183 3.4. *Review and synthesis process*

184 We evaluated every step of the review process within our research group following a mixed  
185 deductive and inductive approach. After prescoping we decided on the superordinate domains i.e.,  
186 ‘preconception’, ‘experience’, and ‘behavior’ which helped build the research strategy. After



187 inclusion we extracted and grouped arising topics within domains and superordinate domains  
188 inductively.

189 We uploaded our searches of Medline and Psycinfo into the software of Rayyan and conducted the  
190 abstract screening via this platform. Screening was conducted by three independent raters  
191 continuously evaluating adherence to inclusion criteria, adapting them when needed.

192

## 193 **4. Results**

### 194 *4.1. Search results*

195 The conducted search of the databases identified 16.830 results. After the removal of 2771  
196 duplicates, we included 14059 studies in the screening of title and abstract. Following the mentioned  
197 PCC-scheme we could exclude 13534 abstracts. Within the remaining 525 studies, 14 papers could  
198 not be retrieved even after directly contacting authors and libraries. During screening of full texts, we  
199 excluded 34 studies because they did not offer new data, 1 study because it lacked peer-review, 141  
200 studies due to wrong population, 56 because of wrong context and 47 because of wrong concept. We  
201 included 232 studies into our data synthesis. The results are presented in a Preferred Reporting Items  
202 for Systematic Reviews and Meta-analyses for Scoping Reviews (PRISMA-ScR) flow diagram [17]. See  
203 figure 1.

204 Figure 1. Flow diagram describing search strategy and results.

205

### 206 *4.2. Studies' characteristics and methodology*

207 Within included articles, the grand majority (41%, n=95) were conducted in the US, 24% (n=54) in EU  
208 countries, 25% (n=57) in the UK and 6% (n=13) in Australia. The remaining studies were conducted in  
209 Canada (n=3), Israel (n=3), Japan (n=2), New Zealand (n=2) and Norway (n=1). Two studies included

210 data from more than one location [18,19]. Because we excluded non-OECD states as context in our  
211 review showing the local distribution of included reports bears limited information.

212 Sixty three percent of included publications used exclusively quantitative measures for the looked-for  
213 outcomes, while 37% used a qualitative or mixed methods approach. For the distribution by year of  
214 publication see figure 2.

215

216 Figure 2. Temporal distribution of publications.

217

#### 218 4.3. Population

219 Most publications (38,8%) used self-rating scales to define depression and identify subjects, most  
220 studies used the PHQ-9, PHQ-8, or PHQ-2. Twenty six percent defined 'depressed patient' as  
221 diagnosed by their primary care practitioner. Other publications used the prescription of  
222 antidepressants for depression, patient chart, or patient history, or gave details on used checklists for  
223 diagnosis. See also table 2.

224

225 Table 2. Description of depression diagnosis in included publications. Total numbers and  
226 percentages.

| Concept of depressed patient      | Number of publications | %     |
|-----------------------------------|------------------------|-------|
| Diagnosis by PCP                  | 61                     | 26,29 |
| Diagnostic interview              | 47                     | 20,26 |
| Self-rating                       | 46                     | 19,83 |
| PHQ                               | 44                     | 18,96 |
| Prescription of an antidepressant | 15                     | 6,46  |
| Chart                             | 9                      | 3,88  |
| Patient history                   | 7                      | 3,02  |
| Checklist                         | 2                      | 0,86  |
| Diagnosis by Author               | 1                      | 0,43  |

227

#### 228 4.4. Context

229 We defined primary care as all outpatient settings dedicated to primary and generalist care. Table 3  
230 gives details on used terms in the included publications. The most used name for the primary care  
231 setting was ‘general practice’ and ‘general practitioner’ (44%). Less used but trending in more recent  
232 publications was ‘collaborative care’ (2%).

233

234 Table 3. Description of primary care context in included publications. Total numbers and  
235 percentages.

| Concept of primary care | Number of publications | %     |
|-------------------------|------------------------|-------|
| General practice        | 96                     | 41,38 |
| Primary care clinic     | 33                     | 14,22 |
| Primary care practice   | 19                     | 8,19  |
| Health center           | 11                     | 4,74  |
| Family practice         | 10                     | 4,31  |
| Veteran care            | 8                      | 3,45  |
| Collaborative care      | 1                      | 0,43  |
| Aged-care facility      | 1                      | 0,43  |
| Family medicine clinic  | 6                      | 2,59  |
| Other                   | 10                     | 4,31  |
| PC                      | 37                     | 15,95 |

236

237 *4.5. Patients’ perspectives on depression treatment in primary care*

238 *4.5.1. Identified terms and domains*

239 In an inductive process we identified relevant domains for the concept and the premeditated  
240 superordinate categories, i.e., preconception, experience, and behavior, served well as a framework  
241 for the established research terms. See table 4 for the grouped domains and superordinate domains  
242 as well as the number of their occurrences among the included publications.

243

244 Table 4. Patients’ perspectives on depression treatment in primary care: Number of occurrences of  
245 named topics, grouped into domains and superordinate domains within the premeditated  
246 framework i.e., ‘preconception’, ‘experience’ and ‘behavior’.

| Patients’ perspectives: | Number of publications on the | Sources |
|-------------------------|-------------------------------|---------|
|-------------------------|-------------------------------|---------|

It is made available under a [CC-BY-ND 4.0 International license](https://creativecommons.org/licenses/by-nd/4.0/) .

| Domain and topic                         | topic      |                                                                                                     |
|------------------------------------------|------------|-----------------------------------------------------------------------------------------------------|
| <b>Domain: Preconception</b>             | <b>105</b> |                                                                                                     |
| 1. Attitude to care                      | 18         | [20–37]                                                                                             |
| 2. Concept of depression                 | 45         | [27,31,33,37–78]                                                                                    |
| 3. Stigma                                | 9          | [35,62,64,70,71,79–82]                                                                              |
| 4. Entitlement to time                   | 1          | [83]                                                                                                |
| 5. Confidence                            | 2          | [22,84]                                                                                             |
| 6. Treatment expectations                | 5          | [32,44,85–87]                                                                                       |
| 7. Knowledge                             | 3          | [71,81,88]                                                                                          |
| 8. Treatment preference                  | 22         | [24,60,70,73,86,89–105]                                                                             |
| <b>Domain: Experience</b>                | <b>128</b> |                                                                                                     |
| 1. Satisfaction                          | 18         | [31,68,88,99,101,106–118]                                                                           |
| 2. Receiving information                 | 3          | [33,43,119]                                                                                         |
| 3. Reported relationship                 | 17         | [20,50,58,68,70,106,109,111,113,114,120–126]                                                        |
| 4. Acceptance of diagnosis and care      | 9          | [32,68,71,127–132]                                                                                  |
| 5. Reported quality of care              | 9          | [21,109,111,128,133–137]                                                                            |
| 6. Experience of depression              | 7          | [65,66,120,138–141]                                                                                 |
| 7. Experience of treatment               | 41         | [31,32,38,40,41,44,58,63,67,68,70,85,90,101,112–115,119,129,130,134–136,142–158]                    |
| 8. Barriers to care                      | 14         | [37,41–43,64,121,157,159–165]                                                                       |
| 9. Facilitators to care                  | 5          | [26,138,162,164,166]                                                                                |
| 10. Participation in treatment decisions | 5          | [43,167–170]                                                                                        |
| <b>Domain: Behavior</b>                  | <b>150</b> |                                                                                                     |
| 1. Health service use                    | 45         | [19,69,106,110,116,126,127,130,143,171–206]                                                         |
| 2. Presenting complaints                 | 14         | [18,62,67,82,184,195,207–214]                                                                       |
| 3. Coping                                | 21         | [22,47,84,92,105,112,114,140,176,178,206,215–224]                                                   |
| 4. Adherence                             | 38         | [20,22,23,27,28,33,37,47,53,58,59,70,85,86,112,116,119,133,134,140,157,167,169,188,193,197,225–236] |
| 5. Help seeking                          | 13         | [62,64,71,126,160,165,190,237–242]                                                                  |
| 6. Initiation of treatment               | 9          | [35,53,86,121,157,193,197,243,244]                                                                  |
| 7. Disclosure                            | 9          | [42,162,231,245–250]                                                                                |
| 8. Decisions concerning treatment        | 1          | [88]                                                                                                |

248 We identified 105 occurrences within ‘preconception’, 128 total occurrences within ‘experience’ and  
249 150 occurrences within ‘behavior’. The most frequently occurring single domains were ‘concept of  
250 depression’ (45), ‘health service use’ (45), ‘experience of depression’ (41), and ‘adherence’ (38). See  
251 also figure 3.

252

253 Figure 3. Patients’ perspectives on depression treatment in primary care: number of occurrences of  
254 domains and superordinate domains i.e., ‘preconception’ (orange), ‘experience’ (green) and  
255 ‘behavior’ (yellow).

256

257 Some terms e.g., ‘preference’, were difficult to group as a whole because of heterogenous scientific  
258 approaches. While some studies asked for treatment preferences in more naïve patients, other  
259 educated their participants thoroughly before asking to decide. Even other publications did not  
260 specify how informed their subjects were when asked for treatment preference or studied a  
261 heterogenous group in respect to that.

262

#### 263 4.5.2. *Identified Barriers and Facilitators*

264 We screened all included studies for named barriers and facilitators of treatment. We defined  
265 ‘barrier’ or ‘facilitator’ as given means by which patients’ behavior is subjectively or observably  
266 impeded or helped. Included papers necessarily included details on barriers and facilitators, which  
267 we categorized as ‘experience’, as well as behaviors they were seen in relation too. Many of the  
268 publications used for this specific synthesis also contained terms from the domain ‘preconception’  
269 e.g., ‘stigma’ was given as a barrier to seeking help, while ‘attitude to drugs’ was commonly  
270 mentioned as impeding adherence to treatment.

271 Overall, we identified 61 publications testing and exploring barriers and facilitators to care. We  
272 grouped the matches using a chronological approach as to which stage of treatment is impeded o.

273 helped with i.e., diagnosis, treatment, and maintenance. Secondly, we grouped the mentioned  
 274 behaviors according to our prior approach landing on ‘help-seeking’, ‘disclosure’, ‘initiation’,  
 275 ‘adherence’, ‘weaning-off medication’ and ‘self-management’. Most publications (34 in total) dealt  
 276 with ‘adherence’ and its barriers and facilitators. Only few publications addressed help-seeking and  
 277 the maintenance of treatment. For full results see table 5.

278

279 Table 5. Publications on barriers and facilitators to depression treatment in primary care from the  
 280 patients’ point of view.

| Treatment stage | Behavior     | Description                                              | Publication                 |
|-----------------|--------------|----------------------------------------------------------|-----------------------------|
| Diagnosis       | Help seeking | Time to initial medical presentation                     | Gormley, O'Leary, 1998      |
|                 |              | Help seeking patterns                                    | Van Hook, 1999              |
|                 |              | Help seeking behaviors                                   | Shin et al., 2002 **        |
|                 |              | Help seeking                                             | Lawrence et al., 2006 *     |
|                 |              | Barriers to help seeking                                 | Callister et al., 2011 **   |
|                 |              | Reasons to not present in PC with depression             | Chew-Graham et al., 2012 ** |
|                 |              | Help seeking pathways                                    | Hansen et al., 2012 **      |
|                 |              | Uptake of GP referral                                    | Holloway et al., 2015       |
|                 |              | Intention to seek help                                   | Schomerus et al., 2019      |
|                 | Disclosure   | Informing the physician of discontinuing antidepressants | Demyttenaere et al., 2001   |
|                 |              | Symptom disclosure                                       | O'Connor et al., 2001       |
|                 |              | Discuss depression                                       | Coorigan et al., 2003       |
|                 |              | Hindering disclosure                                     | Chew-Graham et al., 2009 ** |
|                 |              | Unvoiced agenda                                          | Malpass et al., 2009 **     |
|                 |              | Reasons for not disclosing depression                    | Bell et al., 2011 *         |
|                 |              | Factors hindering or facilitating disclosing symptoms    | Keller et al., 2016 **      |
|                 |              |                                                          |                             |
| Treatment       | Initiation   | Time to initial medical presentation                     | Gormley, O'Leary, 1998      |
|                 |              | Perceived barriers to psychotherapy                      | Mohr et al., 2006-12        |
|                 |              | Barriers to treatment and information                    | Saver et al., 2007 **       |
|                 |              | Filling prescription/                                    | Stecker et al., 2007        |

|                         |                                                                                       |                           |
|-------------------------|---------------------------------------------------------------------------------------|---------------------------|
| Adherence               | initiation of psychotherapy                                                           |                           |
|                         | Initiation of and adherence to treatment (escitalopram or interpersonal therapy)      | Raue et al., 2009         |
|                         | Reasons that prevent individuals from participating in a depression treatment program | Kwong et al., 2012 *      |
|                         | Factors influencing treatment uptake                                                  | Horevitz et al., 2015 *   |
|                         | Initiation of treatment                                                               | Waitzfelder et al., 2018  |
|                         | Initiation of treatment                                                               | Cornwell et al., 2021     |
|                         | Compliance to treatment (medication)                                                  | Johnson, 1981             |
|                         | Adherence to medication                                                               | Lin et al., 1995          |
|                         | Adherence to treatment                                                                | Katon et al., 1995        |
|                         | Adherence to medication                                                               | Katon et al., 2000        |
|                         | Compliance to antidepressants                                                         | Demyttenaere et al., 2001 |
|                         | Adherence                                                                             | Brown et al., 2001        |
|                         | Why patients stop medication                                                          | Manning, Marr, 2003       |
|                         | Adherence to medication                                                               | Solberg et al., 2003      |
|                         | Difficulty with continuation of care                                                  | Gask et al., 2003 **      |
|                         | Adherence to maintenance pharmacotherapy                                              | Lin et al., 2003          |
|                         | Adherence to medication                                                               | Brook et al., 2005        |
|                         | Discontinuation                                                                       | Ruoff et al., 2005        |
|                         | Adherence                                                                             | Bogner et al., 2006       |
|                         | Adherence to sertraline                                                               | Akerblad et al., 2006     |
|                         | Medication concordance                                                                | Badger, Nolan, 2006 *     |
|                         | Adherence to medication                                                               | Brook et al., 2006        |
|                         | Treatment adherence                                                                   | Loh et al., 2007          |
|                         | Adherence to medication                                                               | Weich et al., 2007        |
|                         | Compliance to paroxetine                                                              | Dernovsek et al., 2008    |
|                         | Adherence to medication                                                               | Russel, Kazantzis, 2008   |
|                         | Filling prescriptions                                                                 | van Geffen et al., 2009   |
|                         | Compliance to antidepressants                                                         | Hérique, Kahn, 2009       |
|                         | Completion of online-CBT                                                              | Beattie et al., 2009 *    |
|                         | Initiation of and adherence to treatment (escitalopram or interpersonal therapy)      | Raue et al., 2009         |
|                         | Initiation and continuation of antidepressant treatment                               | van Geffen et al., 2010   |
|                         | Reasons for non-adherence                                                             | Fortney et al., 2011      |
| Barriers to adherence   | Hansen et al., 2012                                                                   |                           |
| Adherence               | Kales et al., 2013                                                                    |                           |
| Adherence to medication | Serrano et al., 2014                                                                  |                           |

|             |                               |                                                                 |                           |
|-------------|-------------------------------|-----------------------------------------------------------------|---------------------------|
|             |                               | Care engagement                                                 | Campbell et al., 2016     |
|             |                               | Initiation of and adherence to Treatment                        | Vuorilehto et al., 2016   |
|             |                               | Adherence to medication                                         | Moise et al., 2017        |
|             |                               | Adherence to antidepressants                                    | Green et al., 2017 *      |
|             |                               | Discontinuation                                                 | Jeffery et al., 2023      |
| Maintenance | Discontinuation of medication | Barriers and facilitators to discontinuation of antidepressants | Leydon et al., 2007 **    |
|             |                               | Barriers to discontinuation of antidepressants                  | Dickinson et al., 2010 ** |

281 \*: publications including qualitative data, \*\*: publications limited to qualitative data

282

283 Further we extracted, categorized, and grouped specific barriers and facilitators and synthesized  
 284 them according to which behavior they are influencing. Tables 6 to 9 show the results. We assigned  
 285 the extracted items to the categories ‘personal’, ‘contextual’, and ‘socioeconomic’.

286 Table 5 contains all publications dealing with barriers and facilitators. For the synthesis in table 6 to 9  
 287 we only included quantitative results from mentioned publications. To comprehensively extract  
 288 qualitative findings conducting a detailed qualitative meta-synthesis would have been needed.

289 Overall, most barriers and facilitators were grouped as either illness- or treatment-related or  
 290 attitudinal. Socioeconomic factors, the impact of practitioners’ characteristics and the doctor-patient  
 291 relationship were less researched.

292

293 Table 6. Barriers to help seeking. Synthesis of data drawn from publications in table 2, limited to  
 294 quantitative findings.

| Domain          | Barriers to help seeking                                            | Facilitators to help seeking       |
|-----------------|---------------------------------------------------------------------|------------------------------------|
| 1. Personal     |                                                                     |                                    |
| Characteristics | N/A                                                                 | N/A                                |
| Illness related | Neuroticism [239]                                                   | More severe depression [237]       |
| Medical history | N/A                                                                 | N/A                                |
| Attitudinal     | Perceived separation between mental health and general health [237] | Desire for emotional support [238] |
|                 | Stigma [237]                                                        | Stigma of psychological care [238] |



|                         |                                                                                                                  |                                                 |
|-------------------------|------------------------------------------------------------------------------------------------------------------|-------------------------------------------------|
|                         | Thinking that it did not affect their health [237]<br>Blaming persons with mental illness for their problem [71] | Self-identification [71]<br>More knowledge [71] |
| <b>2. Contextual</b>    |                                                                                                                  |                                                 |
| Relationship            | Not being asked [237]<br>Thinking that the staff is unhelpful and uninterested [237]                             | N/A                                             |
| Treatment related       | N/A                                                                                                              | N/A                                             |
| Interventions           | N/A                                                                                                              | N/A                                             |
| <b>3. Socioeconomic</b> |                                                                                                                  |                                                 |
| Cultural background     | N/A                                                                                                              | N/A                                             |
| Financial resources     | N/A                                                                                                              | N/A                                             |
| Social inclusion        | N/A                                                                                                              | N/A                                             |
| Other                   | Too busy [237]<br>Support for discrimination [71]                                                                | N/A                                             |

295

296 Table 7. Barriers to disclosure. Synthesis of data drawn from publications in table 2, limited to

297 quantitative findings.

| Domain                 | Barriers to disclosure                                                                                                                                                             | Facilitators to disclosure                 |
|------------------------|------------------------------------------------------------------------------------------------------------------------------------------------------------------------------------|--------------------------------------------|
| <b>1. Personal</b>     |                                                                                                                                                                                    |                                            |
| Characteristics        | Female [161]                                                                                                                                                                       | Female gender [245]                        |
| Illness related        | More severe symptoms [161]                                                                                                                                                         | Higher depressive scores [161,245]         |
| Medical history        | No history of depression [161]                                                                                                                                                     | N/A                                        |
| Attitudinal            | Belief that depression is stigmatizing [161]<br>Belief that one should be in control of depression [161]<br>[Depression] not doctor's job[161]<br>[Mood] private information [161] | N/A                                        |
| <b>2. Contextual</b>   |                                                                                                                                                                                    |                                            |
| Relationship           | Fear of loss of emotional control [161]<br>Unsure how to introduce topic [161]<br>Fear to distract doctor [161]<br>Fear of being thought less of [161]                             | Better relationship [231]                  |
| Characteristics of PCP | N/A                                                                                                                                                                                | N/A                                        |
| Treatment related      | Medication aversion [161]<br>Medical records possibly unsafe [161]<br>Fear of psychiatric or counselling referral [161]<br>Fear of being a 'psychiatric patient'                   | Previous contact with a psychiatrist [245] |

|                         |                                                               |     |
|-------------------------|---------------------------------------------------------------|-----|
|                         | [161]                                                         |     |
| Interventions           | N/A                                                           | N/A |
| <b>3. Socioeconomic</b> |                                                               |     |
| Cultural background     | Hispanic [161]                                                | N/A |
| Financial resources     | Less income [161]                                             | N/A |
| Social inclusion        | Satisfaction with others [247]<br>Better social support [247] | N/A |
| Other                   | Less education [161]                                          | N/A |

298

299 Table 8. Barriers to initiation. Synthesis of data drawn from publications in table 2, limited to  
300 quantitative findings.

| Domain                  | Barriers to initiation                                                                                        | Facilitators to initiation                    | Investigated without significant results                                            |
|-------------------------|---------------------------------------------------------------------------------------------------------------|-----------------------------------------------|-------------------------------------------------------------------------------------|
| <b>1. Personal</b>      |                                                                                                               |                                               |                                                                                     |
| Demographics            | Asian, African-American or Hispanic [243]<br>Senior patients [243,244]<br>Male [244]                          | Male [243]<br>Hispanic [244]                  | N/A                                                                                 |
| Illness related         | Lower baseline PHQ-2 [244]                                                                                    | More severe depression [243]                  | N/A                                                                                 |
| Medical history         | N/A                                                                                                           | Fewer comorbidities [243]                     | N/A                                                                                 |
| Attitudinal             | Discomfort talking about personal issues with someone unknown [159]<br>Concerns what others might think [159] | Strong preference for received treatment [86] | Stigma [35]<br>Belief that psychotherapy weakens the chance of obtaining a job [35] |
| Other                   | More neuroticism [239]<br>Prior mental health diagnosis [244]                                                 | Prior mental health treatment [243]           | N/A                                                                                 |
| <b>2. Contextual</b>    |                                                                                                               |                                               |                                                                                     |
| Relationship            | 'Warm handoff' (for Spanish-speaking Latinos) [121]                                                           | N/A                                           | N/A                                                                                 |
| Characteristics of PCP  | N/A                                                                                                           | N/A                                           | N/A                                                                                 |
| Treatment related       | Cost of psychotherapy [159]<br>Prior visit to clinic [244]                                                    | Same day mental health appointment [244]      | N/A                                                                                 |
| Interventions           | N/A                                                                                                           | N/A                                           | N/A                                                                                 |
| <b>3. Socioeconomic</b> |                                                                                                               |                                               |                                                                                     |
| Cultural background     | N/A                                                                                                           | N/A                                           | N/A                                                                                 |
| Financial resources     | N/A                                                                                                           | N/A                                           | N/A                                                                                 |
| Social inclusion        | Married [244]                                                                                                 | N/A                                           | N/A                                                                                 |
| Other                   | Time constraints [159]                                                                                        | N/A                                           | N/A                                                                                 |

|  |                                                                    |  |  |
|--|--------------------------------------------------------------------|--|--|
|  | Transportation difficulties [159]<br>Care for child or other [159] |  |  |
|--|--------------------------------------------------------------------|--|--|

301

302 Table 9. Barriers to adherence. Synthesis of data drawn from publications in table 2, limited to

303 quantitative findings.

| Domain                  | Barriers to adherence                                                                                                                                                                                 | Facilitators to adherence                                                                                                                                  |
|-------------------------|-------------------------------------------------------------------------------------------------------------------------------------------------------------------------------------------------------|------------------------------------------------------------------------------------------------------------------------------------------------------------|
| <b>1. Personal</b>      |                                                                                                                                                                                                       |                                                                                                                                                            |
| Demographics            | Female [188,193,230]<br>Non-western immigrants [193]<br>Age above 60 years [193]<br>African-American [230]                                                                                            | White [230]<br>Female [230]                                                                                                                                |
| Illness related         | Feeling better [140,197,231,233]<br>Poor to moderate self-rated health [193]<br>Unspecific symptoms [53]<br>Less severe depression [53]<br>Elevated depressive symptoms [197]                         | More severe symptoms [47]<br>Longer illness [23]<br>Fewer symptoms [59]                                                                                    |
| Medical history         | Coexisting personality disorder [228]<br>Drug abuse[228]                                                                                                                                              | N/A                                                                                                                                                        |
| Attitudinal             | Attitude to/ beliefs about drugs [20,27,53,59,197,231]<br>Beliefs about depression [27,47,53]<br>Less agreement with treatment [53,197,233]<br>Internalized stigma [70]                               | Attitude to drugs [22,23,59]<br>Confidence in managing side effects [22]<br>Beliefs about depression [27]<br>Strong preference for received treatment [86] |
| <b>2. Contextual</b>    |                                                                                                                                                                                                       |                                                                                                                                                            |
| Relationship            | Failure of communication [20]<br>Lower perceived norm ('my GP thinks that I need to take medication') [53]                                                                                            | Empowering patients [133]<br>More patient participation [167]                                                                                              |
| Characteristics of PCP  | Male physician [188]<br>Full time physician [188]                                                                                                                                                     | N/A                                                                                                                                                        |
| Treatment related       | Side effects [20,23,197,231-233]<br>Being told to stop by GP [231]<br>Lack of efficacy [197,231,233]<br>Treatment worked quickly [140]<br>Shorter half-life of drug [23]<br>High price of drugs [197] | Occurrence of adverse effects [23]<br>Early treatment response [23]<br>Good effect of medication [28]<br>Number of prescribed medications [236]            |
| Interventions           | N/A                                                                                                                                                                                                   | Educating patients [133,225,226,234]<br>Telemedicine-based collaborative care [37]                                                                         |
| <b>3. Socioeconomic</b> |                                                                                                                                                                                                       |                                                                                                                                                            |
| Cultural background     | N/A                                                                                                                                                                                                   | White [227]                                                                                                                                                |
| Financial resources     | Unemployed [228]                                                                                                                                                                                      | N/A                                                                                                                                                        |

|                  |                                                |                               |
|------------------|------------------------------------------------|-------------------------------|
| Social inclusion | Living alone [228]<br>Less social support [23] | N/A                           |
| Other            | Lower educational level [193]                  | Higher educational level [23] |

304

305 *4.5.3. Presenting Complaints*

306 Building on the concept of ‘barriers and facilitators’ we looked for other relevant topics that might  
307 influence treatment. We decided to take a closer look at presenting complaints as to which  
308 symptoms patients report when depression is present or even diagnosed. While psychological  
309 complaints such as ‘low mood’ point practitioners into the right direction, the primary presentation  
310 of physical symptoms might on the other hand impede diagnosis.

311 We included all publications on ‘presenting complaints’ with the exception of two [208,210] which  
312 did not report the relevant data in a manner that appeared useful for the synthesis. Tylee et al.  
313 studied number and timing symptom report within the consultation [214]. We included the  
314 publication into the following table for an overview over the methodology without extracting the  
315 ‘percentage of somatic complaints’.

316 Due to our inclusion criteria, all outcomes for this category derived from open-ended questions. The  
317 reported symptoms were further categorized by the authors. We defined ‘somatic complaints’ as  
318 physical, vegetative, or somatic symptoms. Table 10 provides an overview of included publications  
319 and extracted data.

320 Between 44 and 100% of studied patients presented only with physical symptoms. The percentage of  
321 patients also reporting physical symptoms when seeking help for depression was given between 22  
322 and 85%. Some publications also studied the correlation between depression state and number of  
323 symptoms given, which we did not further synthesize [82,214].

324 Table 10. Publications covering presenting complaints.

| Publication | Outcome | Number of Participants | Results                               | Percentage of somatic complaints |
|-------------|---------|------------------------|---------------------------------------|----------------------------------|
| Widmer et   | Chief   | 154                    | At time of diagnosis 23% of depressed | 64                               |

|                         |                        |                                       |                                                                                                                                                                                                                                                                                                                                                                                                                     |          |
|-------------------------|------------------------|---------------------------------------|---------------------------------------------------------------------------------------------------------------------------------------------------------------------------------------------------------------------------------------------------------------------------------------------------------------------------------------------------------------------------------------------------------------------|----------|
| al., 1978               | complaint              |                                       | patients gave low mood, 33% sleep disturbances, 31% fatigue, 4% anxiousness or agitation and 9% other symptoms as their chief complaint.                                                                                                                                                                                                                                                                            |          |
| Diamond et al., 1987    | Reason for visit       | 67                                    | The reasons for visit given by patients were 34,5% somatic complaints, 19,5% vegetative and 21% psychological.                                                                                                                                                                                                                                                                                                      | 60       |
| Williamson et al., 1989 | Initial complaint      | 7                                     | In the family practice center depressed patients gave following initial complaints: "General yuck", Physical exam, Kidney problem, Injured finger, Severe headaches, "Multiple complaints", Arthritis.                                                                                                                                                                                                              | 100      |
| Kirmayer et al., 1993   | Presenting complaints  | 202                                   | Of the patients with CES-D scores of 16 or higher, 14% (N=31) were psychosocial presenters, 32% (N=69) were initial somatizers, 24% (N=52) were facultative somatizers, and 23% (N=50) were true somatizers. The presentations of 6% (N=13) were classified as health maintenance visits. These patients were excluded from further comparisons. Facultative and true somatizers only reported physical complaints. | 85*/50   |
| Tylee et al., 1995      | Mentioning of symptoms | 72 (women)                            | A total of 13 mentioned between 10 and 19 physical symptoms and four patients mentioned between 20 and 29 physical symptoms. The first mention of a psychiatric symptom was within the first four mentions of any symptoms for 30 women. 41 women first mentioned a psychiatric symptom after the first four mentions or mentioned no psychiatric symptom.                                                          | N/A      |
| Cornwell et al., 1998   | Presenting complaints  | 90 (40 South Asian, 50 White persons) | Within the South Asian group 27 (67,5%) presented with physical complaints, 38 (95%) presented with psychological complaints (n=40). In the White group 11 (22%) presented with physical complaints, 50 (100%) presented with psychological complaints (n=50).                                                                                                                                                      | 68*/ 22* |
| Waza et al., 1999       | Symptom report         | 189 (85 USA, 104 Japan)               | USA (N=85): 74.1% also reported physical symptoms, 9.4% reported only physical symptoms, 16.5% reported only psychological symptoms. Japan(n=104): 69.3% also reported physical symptoms, 26.9% reported only physical symptoms, 3.8% reported only psychological symptoms.                                                                                                                                         | 74*/ 69* |
| Mckelvey et             | Presenting             | 1057                                  | Of the patients with a CES-D above the                                                                                                                                                                                                                                                                                                                                                                              | 77       |

|                        |                         |     |                                                                                                                                                                                                                                                                                                                                                                                                            |         |
|------------------------|-------------------------|-----|------------------------------------------------------------------------------------------------------------------------------------------------------------------------------------------------------------------------------------------------------------------------------------------------------------------------------------------------------------------------------------------------------------|---------|
| al., 2001              | complaints              |     | cut-off 77% (813) presented with physical complaints, 23% (244) presented with psychological complaints.                                                                                                                                                                                                                                                                                                   |         |
| Yeung et al., 2004     | Presenting complaints   | 29  | The most common presenting complaints were fatigue (N=5), insomnia (N=5), headache (N=4), cough (N=2), pain (N=2), dizziness (N=2), cervical problems (N=1), and sexual dysfunction (N=1). Four complained of psychological symptoms, 2 described feelings of nervousness. One did not spontaneously report any symptoms.                                                                                  | 76      |
| Menchetti et al., 2009 | Reason for consultation | 250 | 110 depressed patients (44.0%) consulted their PCP for psychological or family problems, 102 subjects (40.8%) for physical illness, and 38 subjects (15.2%) for pain symptoms.                                                                                                                                                                                                                             | 56      |
| Chen et al., 2015      | Chief complaint         | 190 | Subjects were most likely to report a chief complaint in the category of Depressed mood/ unhappiness/mood problems (52.1%), followed by Psychosocial stressors (38.9%), Depressive neurovegetative symptoms (31.6% — e.g., poor sleep, poor appetite, low energy), and Depressive psychological symptoms (24.2% — e.g., rumination, difficulty concentrating, agitation). Multiple responses were allowed. | 32*     |
| Heinz et al., 2021     | Reporting complaints    | 430 | 190 (44.2%) patients with depression reported physical complaints only, 42 (9.8%) reported mental complaints only, 124 (28.8%) consulted the GP due to mental and physical complaints, 19 (4.4%) stated no complaints and 55 (12.8%) gave other reasons.                                                                                                                                                   | 44/ 29* |

325 \* Percentage of participants also, not necessarily exclusively, reporting physical  
 326 complaints.

327

## 328 5. Discussion

### 329 5.1. Characteristics of publications and overall findings

330 Even though depression is very common and often treated exclusively in the primary care context,  
331 still most research towards depression care is conducted in specialized contexts [251]. Looking at the  
332 patients' perspective of care beyond symptoms is sometimes a secondary topic, when conducting a  
333 randomized-controlled-trial, but has also been a researched outcome since at least the 1970s. The  
334 majority of publications related to our research questions were published in the early 2000s.  
335 Including patients as important stakeholders not just as subjects but also in planning and conducting  
336 research has been a growing trend in recent years [252]. It is to be expected that this will lead to  
337 more publications on the patient's perspective in years to come.

338 Even though we limited our findings to OECD member states for the screening process it is still  
339 notable that most publications stemmed from the Anglo-American region. Our research zooms in on  
340 a very distinct context that depends on not only individual but also social on political parameters. We  
341 cannot say if findings from the US apply for German primary care settings or vice versa. On the other  
342 hand, primary care itself and its research is a heterogenous field with a multitude of settings and  
343 scientific approaches.

344 Based on the literature we provide a comprehensive framework for the concept 'patients'  
345 perspective' which can be used for future studies, applied internationally, and be built on creating  
346 networks and foci for research and intervention. The implementation of the patients' perspectives in  
347 future guidelines and policy is essential to work towards more accessible care for all patients with  
348 depression. The primary care context provides an ideal setting for impactful research and  
349 intervention [253].

350

## 351 5.2. *Patients' perspectives on depression treatment in primary care*

352 With this work we provide an overview of current literature on patients' perspectives on depression  
353 treatment in primary care. We defined and evaluated a structured approach to the concept trying to

354 grasp its width and depth. By evaluating the method throughout the entire process, we ensured an  
355 objective and understandable approach of literature synthesis.

356 We identified and grouped domains we consider relevant to the concept of patients' perspective.  
357 The premeditated superordinate domains seemed useful for that process.

358 Comparing superordinate domains, their terms, and their numbers of occurrences, we found that  
359 research approaches and scientific research towards them varies. Behavioral terms have been  
360 studied since at least the 1970s and provide clear comparable quantitative measures. The fact that  
361 patients' behavior is observable and close to a physician-centered approach is a possible explanation.

362 Apart from behavioral terms we found that 'satisfaction' and 'preference' are commonly studied  
363 outcomes. They rarely constitute main outcomes of studies but are easily retrievable data derived  
364 from longitudinal and cross-sectional studies. After quality appraisal these publications can be  
365 included in separate systematic reviews. Based on our review, we recommend that these outcomes  
366 should be included in intervention studies. We also recommend to precisely state how these  
367 outcomes were generated to provide accessible and comparable data for evidence synthesis and  
368 future research.

369 Surprisingly, we did not find many publications researching patients' expectations [44,86]. Even  
370 though many terms grouped in 'preconception' are related to 'expectation' it is rarely directly  
371 addressed in studies. Terms like 'acceptability', 'preference' and 'satisfaction' are possibly dependent  
372 on expectations and could be predicted by them. Further research could close that gap and lead to  
373 an early intervention instead of hindsight, as measured by 'satisfaction'. Current research stresses  
374 the link between patient-provider-relationship and satisfaction [254].

375 The terms 'experience of depression' and 'experience of treatment' are broad and more complex to  
376 be synthesized. Publications on those terms used a qualitative approach. We did not perform a  
377 qualitative meta synthesis, which would be an interesting next step regarding these domains.

378



379        5.3.     *Barriers and facilitators to treatment faced by patients.*

380     According to our definition of ‘barriers and facilitators’ i.e., conditions and interventions impeding  
381     and helping with care, we identified and grouped related topics. ‘Barriers and facilitators’ showed an  
382     overlap between all three superordinate domains. While by our definition closely linked to behavior,  
383     we categorized ‘barriers and facilitators’ themselves as ‘experience’. Certain terms we categorized as  
384     ‘preconception’ were also identified as specific barriers e.g., ‘stigma’ and ‘attitude to care’.

385     For scoping, we found this framework to be adequately clear and inclusive.

386     Most research focused on adherence and lack thereof, often contributing as a secondary outcome to  
387     large-scaled medication studies. While drug-associated barriers like ‘side effects’ may not be specific  
388     to the primary care setting, barriers and facilitators describing the patient-provider-relationship may  
389     be. This has been shown for other medical issues and drugs [255].

390     Preference for the prescribed treatment [86], participation [167], and education [234] have been  
391     described as helpful to improve patients’ motivation for and therefore adherence to care.  
392     Nevertheless, more research is needed to build from these findings.

393     We did not find research on geographic and other community factors as a barrier to help-seeking and  
394     care, even though we believe it to be a challenge faced especially by under-served communities, who  
395     might be underrepresented in current research [256]. Among our inclusions, socioeconomic factors  
396     are less researched than personal and contextual factors.

397     Overall, factors that were not directly related to treatment and illness e.g., attitudinal or relationship  
398     aspects, were less researched. With the rise of integrated concepts like collaborative care [257], we  
399     believe these aspects as important to be included into future research and policy.

400     Among our included publications there are also other topics arising that are related to barriers and  
401     facilitators to care even though they do not clearly frame it that way. Not just if patients disclose  
402     symptoms but also the type of presenting complaints influences if they are diagnosed correctly.

403 Among publications studying the quality and quantity of complaints there is a trend towards patients  
404 reporting physical symptoms. Three of the identified studies correlated the quality (physical vs.  
405 psychological), quantity and timing of complaints with the correct recognition of the depressive state  
406 by the GP and found that the report of physical symptoms as well as the delayed report of  
407 psychological symptoms reduce the chances of being diagnosed with depression [195,213,214].  
408 Reporting mainly physical complaints might also be a contextual effect. Williamson et al. compared  
409 patients visiting a family practice with those consulting a psychiatric clinic and found this to be a  
410 distinction i.e., primary care patients reporting more somatic symptoms [209]. Other contextual  
411 effects such as sociocultural aspects, national and regional, might also play a role on patients'  
412 symptom report [18]. It is important to further research presenting complaints and behaviors with  
413 the questions whether and to what degree they can impede proper diagnosis.

414 Data about patient-sided barriers and facilitators towards depression treatment in primary care still  
415 seems inconclusive with contradictory and heterogenous approaches and results. More research and  
416 synthesis are needed for which we provided a framework.

417

#### 418 *5.4. Strengths and limitations*

419 To our knowledge, this is the first literature review on patients' perspectives on depression  
420 treatment in primary care offering a comprehensive framework for future studies.

421 We conducted a premeditated and thorough search for all relevant studies. Because the findings  
422 were limited to studies set in the primary care context, we naturally excluded other designs and  
423 studies that may have contributed to the question of patients' perspectives, especially  
424 preconceptions.

425 We limited our search to MEDLINE and Psycinfo, not specifically looking for grey literature. We  
426 believe our data to be representative of current research and our framework to be applicable for  
427 possibly missed publications.

428 We still think that the identified research topics point out important factors for treatment. We  
429 conceptualized the abstract term ‘perspective’ for the purpose of our research and found it  
430 sufficiently broad and specific. We do not claim our concept of ‘perspective’ to be the only valid one.  
431 We encourage future investigators to critique and build from our concept.

432 In the planning stage of this project, we were advised on its design by patients from the *Munich*  
433 *Alliance Against Depression* (Münchner Bündnis gegen Depression e.V.) an interest group organized  
434 in Germany for patients with a history of depression.

435

## 436 **6. Conclusion**

437 This scoping review conceptualizes ‘patients’ perspective on depression treatment in primary care’ as  
438 a scientific field with its domains, subdomains, and research approaches and provides a  
439 comprehensive overview of current literature, providing a framework for future studies. Patients’  
440 behavioral measures are an easy way to implement patients’ perspectives as a secondary outcome  
441 into prospective and cross-sectional study designs.

442 Findings about specific barriers and facilitators of care which are already described and studied are  
443 summarized as well as grouped in an approachable and systematic manner to help guide future  
444 research. While illness- and treatment-related barriers and facilitators are commonly researched,  
445 there is less data on how the patient-provider-relationship impacts patient behavior. While  
446 adherence is focused on most commonly, there is little evidence on what hinders or encourages  
447 help-seeking, disclosure, or maintenance. Patients often present with physical symptoms when  
448 seeking help for depression which can hinder or delay diagnosis.

449 Patients’ perspectives on depression treatment in primary care are an essential aspect of the  
450 maintenance and improvement of evidence-based care and should be included in guidelines and  
451 policies.

452

## 453 **7. Clinical implications**

454 Even though there is a trend towards more patient participation in research [258], clinical practice  
455 guidelines still rarely consult patients and their experiences in the process of making decisions on  
456 recommendations and implementation.

457 The purpose of this framework is three-fold: First, it can be used as a base for questionnaires  
458 researching the concept of patients' perspectives on depression treatment in primary care.  
459 Quantifiable measures, such as satisfaction, adherence, or preference, are easy to integrate into  
460 clinical trials and offer the possibility for comparison and meta-analysis.

461 Second, patient-related measures about their experience and expectations can help to guide policies,  
462 to validate and evaluate models of quality of care, to improve guideline development processes, and  
463 consequently can make treatment more patient-centered, targeted and efficient. Effective  
464 implementation of guidelines and changes in heuristics in primary care require research that includes  
465 perspectives of all relevant stakeholders along with contextual factors. To create and test tailored  
466 implementation strategies it is crucial to comprehensively understand contextual barriers and  
467 facilitators [259]. Especially barriers to help-seeking are an important gap. A better understanding of  
468 help-seeking and facilitating interventions seems promising to help with early diagnosis in primary  
469 care, prevent chronicity, and reduce the burden of depression.

470 Third, the synthesis of barriers and facilitators offers a theoretical base on which networks can be  
471 built to better understand what the possible targets for intervention are. In particular, an  
472 understanding of contextual barriers from the patients' point of view can help to tailor effective  
473 implementation strategies.

474 Figure 4 shows a theoretical model of how patients' perspectives on care can be included into the  
475 forming and implementation of clinical practice guidelines to help with evidence-based and effective  
476 treatment of depression in primary care.

477

478 Figure 4. Model of impact of patients' perspectives on clinical practice guidelines, primary care, and  
479 vice-versa.

480

## 481 Acknowledgements

482 \*The POKAL-Group (Prädiktoren und Klinische Ergebnisse bei depressiven Erkrankungen in der  
483 hausärztlichen Versorgung (POKAL, DFG-GrK 2621)) consists of the following principle investigators:  
484 Tobias Dreischulte, Peter Falkaj, Jochen Gensichen, Peter Henningsen, Markus Bühner, Caroline Jung-  
485 Sievers, Helmut Krcmar, Karoline Lukaschek, Gabriele Pitschel-Walz and Antonius Schneider. The  
486 following doctoral students are members of the POKAL-Group: Katharina Biersack, Constantin Brand,  
487 Vita Brisnik, Christopher Ebert, Julia Eder, Feyza Gökce, Carolin Haas, Lisa Hattenkofer, Lukas Kaupe,  
488 Jonas Raub, Philipp Reindl-Spanner, Hannah Schillok, Petra Schönweger, Clara Teusen, Marie Vogel,  
489 Victoria von Schrottenberg, Jochen Vukas and Puya Younesi.

490

## 491 References

- 492 1. Vandeleur CL, Fassassi S, Castela E, Glaus J, Strippoli M-PF, Lasserre AM, et al. Prevalence and  
493 correlates of DSM-5 major depressive and related disorders in the community. *Psychiatry Res.*  
494 2017; 250:50–8. Epub 2017/01/23. doi: 10.1016/j.psychres.2017.01.060 PMID: 28142066.
- 495 2. Stahmeyer JT, Märten C, Eidt-Koch D, Kahl KG, Zeidler J, Eberhard S. The State of Care for  
496 Persons With a Diagnosis of Depression. *Dtsch Arztebl Int.* 2022; 119:458–65.  
497 doi: 10.3238/arztebl.m2022.0204 PMID: 35506291.
- 498 3. Johnston KM, Powell LC, Anderson IM, Szabo S, Cline S. The burden of treatment-resistant  
499 depression: A systematic review of the economic and quality of life literature. *J Affect Disord.*  
500 2019; 242:195–210. Epub 2018/06/27. doi: 10.1016/j.jad.2018.06.045 PMID: 30195173.
- 501 4. Trautmann S, Beesdo-Baum K. The Treatment of Depression in Primary Care. *Dtsch Arztebl Int.*  
502 2017; 114:721–8. doi: 10.3238/arztebl.2017.0721 PMID: 29143731.
- 503 5. Zafra-Tanaka JH, Goicochea-Lugo S, Villarreal-Zegarra D, Taype-Rondan A. Characteristics and  
504 quality of clinical practice guidelines for depression in adults: a scoping review. *BMC Psychiatry.*  
505 2019; 19:76. Epub 2019/02/20. doi: 10.1186/s12888-019-2057-z PMID: 30786870.
- 506 6. Jin Y-H, Tan L-M, Khan KS, Deng T, Huang C, Han F, et al. Determinants of successful guideline  
507 implementation: a national cross-sectional survey. *BMC Med Inform Decis Mak.* 2021; 21:19.  
508 Epub 2021/01/14. doi: 10.1186/s12911-020-01382-w PMID: 33446198.
- 509 7. Arbeitsgemeinschaft für Neuropsychopharmakologie und Pharmakopsychiatrie e.V.,  
510 Arzneimittelkommission der deutschen Ärzteschaft, Arzneimittelkommission der Deutschen  
511 Apotheker, Bundesarbeitsgemeinschaft Selbsthilfe von Menschen mit Behinderung,  
512 chronischer Erkrankung und ihren Angehörigen e. V., Bundespsychotherapeutenkammer,  
513 Bundesverband der Angehörigen psychisch erkrankter Menschen e. V., et al. Nationale  
514 VersorgungsLeitlinie Unipolare Depression - Langfassung. Bundesärztekammer (BÄK);  
515 Kassenärztliche Bundesvereinigung (KBV); Arbeitsgemeinschaft der Wissenschaftlichen  
516 Medizinischen Fachgesellschaften (AWMF); 2022.
- 517 8. Lee Y, Brietzke E, Cao B, Chen Y, Linnaranta O, Mansur RB, et al. Development and  
518 implementation of guidelines for the management of depression: a systematic review. *Bull*

- 519 World Health Organ. 2020; 98:683-697H. Epub 2020/08/27. doi: 10.2471/BLT.20.251405 PMID:  
520 33177758.
- 521 9. Correa VC, Lugo-Agudelo LH, Aguirre-Acevedo DC, Contreras JAP, Borrero AMP, Patiño-Lugo DF,  
522 et al. Individual, health system, and contextual barriers and facilitators for the implementation  
523 of clinical practice guidelines: a systematic metareview. *Health Res Policy Syst.* 2020; 18:74.  
524 Epub 2020/06/29. doi: 10.1186/s12961-020-00588-8 PMID: 32600417.
- 525 10. Porter J, Boyd C, Skandari MR, Laiteerapong N. Revisiting the Time Needed to Provide Adult  
526 Primary Care. *J Gen Intern Med.* 2023; 38:147–55. Epub 2022/07/01. doi: 10.1007/s11606-022-  
527 07707-x PMID: 35776372.
- 528 11. Wood E, Ohlsen S, Ricketts T. What are the barriers and facilitators to implementing  
529 Collaborative Care for depression? A systematic review. *J Affect Disord.* 2017; 214:26–43. Epub  
530 2017/02/22. doi: 10.1016/j.jad.2017.02.028 PMID: 28266319.
- 531 12. Epstein RM, Street RL. The values and value of patient-centered care. *Ann Fam Med.* 2011;  
532 9:100–3. doi: 10.1370/afm.1239 PMID: 21403134.
- 533 13. Kersting C, Hülsmann J, Weckbecker K, Mortsiefer A. Patients' perspective on supposedly  
534 patient-relevant process and outcome parameters: a cross-sectional survey within the 'PRO  
535 patients study'. *BMC Health Serv Res.* 2022; 22:72. Epub 2022/01/14. doi: 10.1186/s12913-021-  
536 07437-6 PMID: 35031052.
- 537 14. Pilkonis PA, Yu L, Dodds NE, Johnston KL, Maihoefer CC, Lawrence SM. Validation of the  
538 depression item bank from the Patient-Reported Outcomes Measurement Information System  
539 (PROMIS) in a three-month observational study. *J Psychiatr Res.* 2014; 56:112–9. Epub  
540 2014/05/29. doi: 10.1016/j.jpsychires.2014.05.010 PMID: 24931848.
- 541 15. Kersting C, Kneer M, Barzel A. Patient-relevant outcomes: what are we talking about? A scoping  
542 review to improve conceptual clarity. *BMC Health Serv Res.* 2020; 20:596. Epub 2020/06/29.  
543 doi: 10.1186/s12913-020-05442-9 PMID: 32600321.
- 544 16. Aromataris E, Munn Z. *JB I manual for evidence synthesis.* Adelaide, Australia: Joanna Briggs  
545 Institute; 2020.
- 546 17. Tricco AC, Lillie E, Zarin W, O'Brien KK, Colquhoun H, Levac D, et al. PRISMA Extension for  
547 Scoping Reviews (PRISMA-ScR): Checklist and Explanation. *Ann Intern Med.* 2018; 169:467–73.  
548 Epub 2018/09/04. doi: 10.7326/M18-0850 PMID: 30178033.
- 549 18. Waza K, Graham AV, Zyzanski SJ, Inoue K. Comparison of symptoms in Japanese and American  
550 depressed primary care patients. *Fam Pract.* 1999; 16:528–33. doi: 10.1093/fampra/16.5.528  
551 PMID: 10533952.
- 552 19. McCracken C, Dalgard OS, Ayuso-Mateos JL, Casey P, Wilkinson G, Lehtinen V, et al. Health  
553 service use by adults with depression: community survey in five European countries. Evidence  
554 from the ODIN study. *Br J Psychiatry.* 2006; 189:161–7. doi: 10.1192/bjp.bp.105.015081 PMID:  
555 16880487.
- 556 20. Johnson DA. Depression: treatment compliance in general practice. *Acta Psychiatr Scand Suppl.*  
557 1981; 290:447–53. doi: 10.1111/j.1600-0447.1981.tb00751.x PMID: 6939323.
- 558 21. Cooper LA, Brown C, Vu HT, Palenchar DR, Gonzales JJ, Ford DE, et al. Primary care patients'  
559 opinions regarding the importance of various aspects of care for depression. *Gen Hosp  
560 Psychiatry.* 2000; 22:163–73. doi: 10.1016/s0163-8343(00)00073-6 PMID: 10880709.
- 561 22. Lin EHB, Korff M von, Ludman EJ, Rutter C, Bush TM, Simon GE, et al. Enhancing adherence to  
562 prevent depression relapse in primary care. *Gen Hosp Psychiatry.* 2003; 25:303–10.  
563 doi: 10.1016/s0163-8343(03)00074-4 PMID: 12972220.
- 564 23. Brook OH, van Hout HP, Stalman WA, Haan M de. Nontricyclic Antidepressants. *Journal of  
565 Clinical Psychopharmacology.* 2006; 26:643–7. doi: 10.1097/01.jcp.0000246217.34024.53.

- 566 **24.** Mergl R, Henkel V, Allgaier A-K, Kramer D, Hautzinger M, Kohnen R, et al. Are treatment  
567 preferences relevant in response to serotonergic antidepressants and cognitive-behavioral  
568 therapy in depressed primary care patients? Results from a randomized controlled trial  
569 including a patients' choice arm. *Psychother Psychosom.* 2011; 80:39–47. Epub 2010/10/23.  
570 doi: 10.1159/000318772 PMID: 20975325.
- 571 **25.** Jaffray M, Cardy AH, Reid IC, Cameron IM. Why do patients discontinue antidepressant therapy  
572 early? A qualitative study. *Eur J Gen Pract.* 2014; 20:167–73. Epub 2013/10/25.  
573 doi: 10.3109/13814788.2013.838670 PMID: 24160364.
- 574 **26.** Vannoy S, Park M, Maroney MR, Unützer J, Apesoa-Varano EC, Hinton L. The Perspective of  
575 Older Men With Depression on Suicide and Its Prevention in Primary Care. *Crisis.* 2018; 39:397–  
576 405. Epub 2018/04/05. doi: 10.1027/0227-5910/a000511 PMID: 29618265.
- 577 **27.** Weich S, Morgan L, King M, Nazareth I. Attitudes to depression and its treatment in primary  
578 care. *Psychol Med.* 2007; 37:1239–48. Epub 2007/06/11. doi: 10.1017/S0033291707000931  
579 PMID: 17559705.
- 580 **28.** Serrano MJ, Vives M, Mateu C, Vicens C, Molina R, Puebla-Guedea M, et al. Therapeutic  
581 adherence in primary care depressed patients: a longitudinal study. *Actas Esp Psiquiatr.* 2014;  
582 42:91–8.
- 583 **29.** Pyne JM, Rost KM, Farahati F, Tripathi SP, Smith J, Williams DK, et al. One size fits some: the  
584 impact of patient treatment attitudes on the cost-effectiveness of a depression primary-care  
585 intervention. *Psychol Med.* 2005; 35:839–54. doi: 10.1017/s0033291704003332 PMID:  
586 15997604.
- 587 **30.** Rost K, Nutting P, Smith J, Coyne JC, Cooper-Patrick L, Rubenstein L. The role of competing  
588 demands in the treatment provided primary care patients with major depression. *Arch Fam*  
589 *Med.* 2000; 9:150–4. doi: 10.1001/archfami.9.2.150 PMID: 10693732.
- 590 **31.** Deen TL, Fortney JC, Pyne JM. Relationship between satisfaction, patient-centered care,  
591 adherence and outcomes among patients in a collaborative care trial for depression. *Adm*  
592 *Policy Ment Health.* 2011; 38:345–55. doi: 10.1007/s10488-010-0322-z PMID: 20978932.
- 593 **32.** Finucane A, Mercer SW. An exploratory mixed methods study of the acceptability and  
594 effectiveness of Mindfulness-Based Cognitive Therapy for patients with active depression and  
595 anxiety in primary care. *BMC Psychiatry.* 2006; 6:14. Epub 2006/04/07. doi: 10.1186/1471-  
596 244X-6-14 PMID: 16603060.
- 597 **33.** Maidment R, Livingston G, Katona C. Just keep taking the tablets: adherence to antidepressant  
598 treatment in older people in primary care. *Int J Geriatr Psychiatry.* 2002; 17:752–7.  
599 doi: 10.1002/gps.688 PMID: 12211126.
- 600 **34.** Givens JL, Datto CJ, Ruckdeschel K, Knott K, Zubritsky C, Oslin DW, et al. Older patients' aversion  
601 to antidepressants. A qualitative study. *J Gen Intern Med.* 2006; 21:146–51. Epub 2005/12/07.  
602 doi: 10.1111/j.1525-1497.2005.00296.x PMID: 16336620.
- 603 **35.** Stecker T, Alvidrez J. Patient decision-making regarding entry into psychotherapy to treat  
604 depression. *Issues Ment Health Nurs.* 2007; 28:811–20. doi: 10.1080/01612840701415967  
605 PMID: 17654113.
- 606 **36.** Bogner HR, Cahill E, Frauenhoffer C, Barg FK. Older primary care patient views regarding  
607 antidepressants: A mixed methods approach. *J Mental Health.* 2009; 18:57–64.  
608 doi: 10.1080/09638230701677795 PMID: 19693280.
- 609 **37.** Fortney JC, Pyne JM, Edlund MJ, Stecker T, Mittal D, Robinson DE, et al. Reasons for  
610 antidepressant nonadherence among veterans treated in primary care clinics. *J Clin Psychiatry.*  
611 2011; 72:827–34. Epub 2010/11/16. doi: 10.4088/JCP.09m0528blu PMID: 21208579.
- 612 **38.** Stark A, Kaduszkiewicz H, Stein J, Maier W, Hesel K, Weyerer S, et al. A qualitative study on  
613 older primary care patients' perspectives on depression and its treatments - potential barriers

- 614 to and opportunities for managing depression. *BMC Fam Pract.* 2018; 19:2. Epub 2018/01/03.  
615 doi: 10.1186/s12875-017-0684-3 PMID: 29295706.
- 616 39. Körner H, Newman C, Limin M, Kidd MR, Saltman D, Kippax S. 'The black dog just came and sat  
617 on my face and built a kennel': Gay men making sense of 'depression'. *Health (London).* 2011;  
618 15:417–36. Epub 2010/12/15. doi: 10.1177/1363459310372511 PMID: 21169202.
- 619 40. Gask L, Aseem S, Waquas A, Waheed W. Isolation, feeling 'stuck' and loss of control:  
620 understanding persistence of depression in British Pakistani women. *J Affect Disord.* 2011;  
621 128:49–55. Epub 2010/07/14. doi: 10.1016/j.jad.2010.06.023 PMID: 20633932.
- 622 41. Dickinson R, Knapp P, House AO, Dimri V, Zermansky A, Petty D, et al. Long-term prescribing of  
623 antidepressants in the older population: a qualitative study. *Br J Gen Pract.* 2010; 60:e144-55.  
624 doi: 10.3399/bjgp10X483913 PMID: 20353660.
- 625 42. Chew-Graham CA, Sharp D, Chamberlain E, Folkes L, Turner KM. Disclosure of symptoms of  
626 postnatal depression, the perspectives of health professionals and women: a qualitative study.  
627 *BMC Fam Pract.* 2009; 10:7. Epub 2009/01/21. doi: 10.1186/1471-2296-10-7 PMID: 19159478.
- 628 43. Saver BG, Van-Nguyen V, Keppel G, Doescher MP. A qualitative study of depression in primary  
629 care: missed opportunities for diagnosis and education. *J Am Board Fam Med.* 2007; 20:28–35.  
630 doi: 10.3122/jabfm.2007.01.060026 PMID: 17204732.
- 631 44. Keeley RD, West DR, Tutt B, Nutting PA. A qualitative comparison of primary care clinicians' and  
632 their patients' perspectives on achieving depression care: implications for improving outcomes.  
633 *BMC Fam Pract.* 2014; 15:13. Epub 2014/01/15. doi: 10.1186/1471-2296-15-13 PMID:  
634 24428952.
- 635 45. Gordon I, Ling J, Robinson L, Hayes C, Crosland A. Talking about depression during interactions  
636 with GPs: a qualitative study exploring older people's accounts of their depression narratives.  
637 *BMC Fam Pract.* 2018; 19:173. Epub 2018/11/03. doi: 10.1186/s12875-018-0857-8 PMID:  
638 30390637.
- 639 46. 'You're depressed'; 'no I'm not': GPs' and patients' different models of depression. UMSD MSc  
640 in General Practice Teaching Group. *Br J Gen Pract.* 1999; 49:123–4.
- 641 47. Brown C, Dunbar-Jacob J, Palenchar DR, Kelleher KJ, Bruehlman RD, Sereika S, et al. Primary  
642 care patients' personal illness models for depression: a preliminary investigation. *Fam Pract.*  
643 2001; 18:314–20. doi: 10.1093/fampra/18.3.314 PMID: 11356741.
- 644 48. Bogner HR, Dahlberg B, Vries HF de, Cahill E, Barg FK. Older patients' views on the relationship  
645 between depression and heart disease. *Fam Med.* 2008; 40:652–7.
- 646 49. Wittink MN, Joo JH, Lewis LM, Barg FK. Losing faith and using faith: older African Americans  
647 discuss spirituality, religious activities, and depression. *J Gen Intern Med.* 2009; 24:402–7. Epub  
648 2009/01/21. doi: 10.1007/s11606-008-0897-1 PMID: 19156471.
- 649 50. Gabbay M, Shiels C, Bower P, Sibbald B, King M, Ward E. Patient-practitioner agreement: does  
650 it matter. *Psychol Med.* 2003; 33:241–51. doi: 10.1017/s0033291702006992 PMID: 12622303.
- 651 51. Cornford CS, Hill A, Reilly J. How patients with depressive symptoms view their condition: a  
652 qualitative study. *Fam Pract.* 2007; 24:358–64. Epub 2007/07/13.  
653 doi: 10.1093/fampra/cmm032 PMID: 17630269.
- 654 52. Hansson M, Chotai J, Bodlund O. Patients' beliefs about the cause of their depression. *J Affect*  
655 *Disord.* 2010; 124:54–9. Epub 2009/11/18. doi: 10.1016/j.jad.2009.10.032 PMID: 19923007.
- 656 53. van Geffen ECG, Heerdink ER, Hugtenburg JG, Siero FW, Egberts ACG, van Hulst R. Patients'  
657 perceptions and illness severity at start of antidepressant treatment in general practice. *Int J*  
658 *Pharm Pract.* 2010; 18:217–25. doi: 10.1111/j.2042-7174.2010.00035.x PMID: 20636673.
- 659 54. Lynch J, Moore M, Moss-Morris R, Kendrick T. Are patient beliefs important in determining  
660 adherence to treatment and outcome for depression? Development of the beliefs about



- 661 depression questionnaire. *J Affect Disord.* 2011; 133:29–41. Epub 2011/04/19.  
662 doi: 10.1016/j.jad.2011.03.019 PMID: 21507489.
- 663 55. Lynch J, Moore M, Moss-Morris R, Kendrick T. Do patients' illness beliefs predict depression  
664 measures at six months in primary care; a longitudinal study. *J Affect Disord.* 2015;  
665 174:665–71. Epub 2014/12/11. doi: 10.1016/j.jad.2014.12.005 PMID: 25590645.
- 666 56. Aznar-Lou I, Iglesias-González M, Rubio-Valera M, Peñarrubia-Maria MT, Mendive JM,  
667 Murrugarra-Centurión AG, et al. Diagnostic accuracy and treatment approach to depression in  
668 primary care: predictive factors. *Fam Pract.* 2019; 36:3–11. doi: 10.1093/fampra/cmz098 PMID:  
669 30423158.
- 670 57. Brown C, Battista DR, Bruehlman R, Sereika SS, Thase ME, Dunbar-Jacob J. Beliefs about  
671 antidepressant medications in primary care patients: relationship to self-reported adherence.  
672 *Med Care.* 2005; 43:1203–7. doi: 10.1097/01.mlr.0000185733.30697.f6 PMID: 16299431.
- 673 58. Badger F, Nolan P. Concordance with antidepressant medication in primary care. *Nurs Stand.*  
674 2006; 20:35–40. doi: 10.7748/ns2006.09.20.52.35.c4492 PMID: 16989339.
- 675 59. Russell J, Kazantzis N. Medication beliefs and adherence to antidepressants in primary care. *N Z*  
676 *Med J.* 2008; 121:14–20.
- 677 60. Turner KM, Sharp D, Folkes L, Chew-Graham C. Women's views and experiences of  
678 antidepressants as a treatment for postnatal depression: a qualitative study. *Fam Pract.* 2008;  
679 25:450–5. Epub 2008/09/30. doi: 10.1093/fampra/cmn056 PMID: 18826994.
- 680 61. Danielsson U, Bengs C, Lehti A, Hammarström A, Johansson EE. Struck by lightning or slowly  
681 suffocating - gendered trajectories into depression. *BMC Fam Pract.* 2009; 10:56. Epub  
682 2009/08/11. doi: 10.1186/1471-2296-10-56 PMID: 19671133.
- 683 62. Yeung A, Chang D, Gresham RL, Nierenberg AA, Fava M. Illness beliefs of depressed Chinese  
684 American patients in primary care. *The Journal of nervous and mental disease.* 2004; 192:324–  
685 7. doi: 10.1097/01.nmd.0000120892.96624.00 PMID: 15060408.
- 686 63. Saito M, Kawabata H, Murakami M, Maezawa M. Factors in the awareness of depression,  
687 focusing on perceptual dissimilarities between PCPs and patients: an exploratory and  
688 qualitative research. *Hokkaido Igaku Zasshi.* 2011; 86:79–83.
- 689 64. Kwong K, Chung H, Cheal K, Chou JC, Chen T. Disability beliefs and help-seeking behavior of  
690 depressed Chinese-American patients in a primary care setting. *J Soc Work Disabil Rehabil.*  
691 2012; 11:81–99. doi: 10.1080/1536710X.2012.677602 PMID: 22630598.
- 692 65. Cornford CS, Umeh K, Manshani N. Heroin users' experiences of depression: a qualitative study.  
693 *Fam Pract.* 2012; 29:586–92. Epub 2012/02/22. doi: 10.1093/fampra/cms014 PMID: 22357579.
- 694 66. Simmonds RL, Tylee A, Walters P, Rose D. Patients' perceptions of depression and coronary  
695 heart disease: a qualitative UPBEAT-UK study. *BMC Fam Pract.* 2013; 14:38. Epub 2013/03/19.  
696 doi: 10.1186/1471-2296-14-38 PMID: 23509869.
- 697 67. Chen JA, Hung GC-L, Parkin S, Fava M, Yeung AS. Illness beliefs of Chinese American immigrants  
698 with major depressive disorder in a primary care setting. *Asian J Psychiatr.* 2015; 13:16–22.  
699 Epub 2014/12/22. doi: 10.1016/j.ajp.2014.12.005 PMID: 25563074.
- 700 68. Frémont P, Gérard A, Sechter D, Vanelle JM, Vidal M. L'alliance thérapeutique au début d'une  
701 prise en charge pour dépression par le généraliste. *Encephale.* 2008; 34:205–10. Epub  
702 2008/04/14. doi: 10.1016/j.encep.2008.03.001 PMID: 18597730.
- 703 69. van den Boogaard TM, Verhaak PFM, van Dyck R, Spinhoven P. The impact of causal  
704 attributions on diagnosis and successful referral of depressed patients in primary care. *Soc Sci*  
705 *Med.* 2011; 73:1733–40. Epub 2011/10/13. doi: 10.1016/j.socscimed.2011.09.027 PMID:  
706 22036103.
- 707 70. Campbell DG, Bonner LM, Bolkan CR, Lanto AB, Zivin K, Waltz TJ, et al. Stigma Predicts  
708 Treatment Preferences and Care Engagement Among Veterans Affairs Primary Care Patients

- 709 with Depression. *Ann Behav Med.* 2016; 50:533–44. doi: 10.1007/s12160-016-9780-1 PMID:  
710 26935310.
- 711 **71.** Schomerus G, Stolzenburg S, Freitag S, Speerforck S, Janowitz D, Evans-Lacko S, et al. Stigma as  
712 a barrier to recognizing personal mental illness and seeking help: a prospective study among  
713 untreated persons with mental illness. *Eur Arch Psychiatry Clin Neurosci.* 2019; 269:469–79.  
714 Epub 2018/04/20. doi: 10.1007/s00406-018-0896-0 PMID: 29679153.
- 715 **72.** Brown C, Schulberg HC, Madonia MJ. Clinical presentations of major depression by African  
716 Americans and whites in primary medical care practice. *J Affect Disord.* 1996; 41:181–91.  
717 doi: 10.1016/s0165-0327(96)00085-7 PMID: 8988450.
- 718 **73.** Schneider A, Körner T, Mehring M, Wensing M, Elwyn G, Szecsenyi J. Impact of age, health  
719 locus of control and psychological co-morbidity on patients' preferences for shared decision  
720 making in general practice. *Patient Educ Couns.* 2006; 61:292–8.  
721 doi: 10.1016/j.pec.2005.04.008 PMID: 15896943.
- 722 **74.** Kessler D, Lloyd K, Lewis G, Gray DP. Cross sectional study of symptom attribution and  
723 recognition of depression and anxiety in primary care. *BMJ.* 1999; 318:436–9.  
724 doi: 10.1136/bmj.318.7181.436 PMID: 9974461.
- 725 **75.** Parker G, Parker K. Influence of symptom attribution on reporting depression and recourse to  
726 treatment. *Aust N Z J Psychiatry.* 2003; 37:469–74. doi: 10.1046/j.1440-1614.2003.01205.x  
727 PMID: 12873333.
- 728 **76.** Lawrence V, Murray J, Banerjee S, Turner S, Sangha K, Byng R, et al. Concepts and causation of  
729 depression: a cross-cultural study of the beliefs of older adults. *Gerontologist.* 2006; 46:23–32.  
730 doi: 10.1093/geront/46.1.23 PMID: 16452281.
- 731 **77.** Elwy AR, Glickman ME, Bokhour BG, Dell NS, Mueller NM, Zhao S, et al. Using Mixed Methods  
732 to Examine the Role of Veterans' Illness Perceptions on Depression Treatment Utilization and  
733 HEDIS Concordance. *Med Care.* 2016; 54:e35-42. doi: 10.1097/MLR.000000000000056 PMID:  
734 24374425.
- 735 **78.** Saint Arnault D, Woo S. The Importance of Perceived Need in Help Seeking for Japanese  
736 Women: A Preliminary Investigation of Sociocultural Contributions. *Arch Psychiatr Nurs.* 2017;  
737 31:572–7. Epub 2017/07/28. doi: 10.1016/j.apnu.2017.07.006 PMID: 29179823.
- 738 **79.** Vega WA, Rodriguez MA, Ang A. Addressing stigma of depression in Latino primary care  
739 patients. *Gen Hosp Psychiatry.* 2010; 32:182–91. Epub 2009/12/05.  
740 doi: 10.1016/j.genhosppsych.2009.10.008 PMID: 20302993.
- 741 **80.** Chen JA, Shapero BG, Trinh N-HT, Chang TE, Parkin S, Alpert JE, et al. Association Between  
742 Stigma and Depression Outcomes Among Chinese Immigrants in a Primary Care Setting. *J Clin  
743 Psychiatry.* 2016; 77:e1287-e1292. doi: 10.4088/JCP.15m10225 PMID: 27631145.
- 744 **81.** Lopez V, Sanchez K, Killian MO, Eghaneyan BH. Depression screening and education: an  
745 examination of mental health literacy and stigma in a sample of Hispanic women. *BMC Public  
746 Health.* 2018; 18:646. Epub 2018/05/22. doi: 10.1186/s12889-018-5516-4 PMID: 29788998.
- 747 **82.** Heinz I, Baldofski S, Beesdo-Baum K, Knappe S, Kohls E, Rummel-Kluge C. "Doctor, my back  
748 hurts and I cannot sleep." Depression in primary care patients: Reasons for consultation and  
749 perceived depression stigma. *PLoS One.* 2021; 16:e0248069. Epub 2021/03/05.  
750 doi: 10.1371/journal.pone.0248069 PMID: 33667268.
- 751 **83.** Pollock K, Grime J. Patients' perceptions of entitlement to time in general practice consultations  
752 for depression: qualitative study. *BMJ.* 2002; 325:687.
- 753 **84.** Taylor AK, Palmer VJ, Davidson S, Fletcher S, Gunn J. Patient reported self-help strategies and  
754 the perceived benefits for managing sub-threshold depressive symptoms: A nested qualitative  
755 study of Australian primary care attendees. *Health Soc Care Community.* 2022; 30:e2097-  
756 e2108. Epub 2021/11/12. doi: 10.1111/hsc.13646 PMID: 34766664.

- 757 **85.** Beattie A, Shaw A, Kaur S, Kessler D. Primary-care patients' expectations and experiences of  
758 online cognitive behavioural therapy for depression: a qualitative study. *Health Expect.* 2009;  
759 12:45–59. doi: 10.1111/j.1369-7625.2008.00531.x PMID: 19250152.
- 760 **86.** Raue PJ, Schulberg HC, Heo M, Klimstra S, Bruce ML. Patients' depression treatment  
761 preferences and initiation, adherence, and outcome: a randomized primary care study.  
762 *Psychiatr Serv.* 2009; 60:337–43. doi: 10.1176/ps.2009.60.3.337 PMID: 19252046.
- 763 **87.** Palmer V, Gunn J, Kokanovic R, Griffiths F, Shrimpton B, Hurworth R, et al. Diverse voices,  
764 simple desires: a conceptual design for primary care to respond to depression and related  
765 disorders. *Fam Pract.* 2010; 27:447–58. Epub 2010/04/08. doi: 10.1093/fampra/cmqq016 PMID:  
766 20378630.
- 767 **88.** Wills CE, Holmes-Rovner M. Preliminary validation of the Satisfaction With Decision scale with  
768 depressed primary care patients. *Health Expect.* 2003; 6:149–59. doi: 10.1046/j.1369-  
769 6513.2003.00220.x PMID: 12752743.
- 770 **89.** Dwight-Johnson M, Sherbourne CD, Liao D, Wells KB. Treatment preferences among depressed  
771 primary care patients. *J Gen Intern Med.* 2000; 15:527–34. doi: 10.1046/j.1525-  
772 1497.2000.08035.x PMID: 10940143.
- 773 **90.** Bedi N, Chilvers C, Churchill R, Dewey M, Duggan C, Fielding K, et al. Assessing effectiveness of  
774 treatment of depression in primary care. Partially randomised preference trial. *Br J Psychiatry.*  
775 2000; 177:312–8. doi: 10.1192/bjp.177.4.312 PMID: 11116771.
- 776 **91.** Dwight-Johnson M, Unutzer J, Sherbourne C, Tang L, Wells KB. Can quality improvement  
777 programs for depression in primary care address patient preferences for treatment. *Med Care.*  
778 2001; 39:934–44. doi: 10.1097/00005650-200109000-00004 PMID: 11502951.
- 779 **92.** Löwe B, Schulz U, Gräfe K, Wilke S. Medical patients' attitudes toward emotional problems and  
780 their treatment. What do they really want. *J Gen Intern Med.* 2006; 21:39–45.  
781 doi: 10.1111/j.1525-1497.2005.0266.x PMID: 16423121.
- 782 **93.** Gum AM, Areán PA, Hunkeler E, Tang L, Katon W, Hitchcock P, et al. Depression treatment  
783 preferences in older primary care patients. *Gerontologist.* 2006; 46:14–22.  
784 doi: 10.1093/geront/46.1.14 PMID: 16452280.
- 785 **94.** Backenstrass M, Joest K, Frank A, Hingmann S, Mundt C, Kronmüller K-T. Preferences for  
786 treatment in primary care: a comparison of nondepressive, subsyndromal and major depressive  
787 patients. *Gen Hosp Psychiatry.* 2006; 28:178–80. doi: 10.1016/j.genhosppsy.2005.10.001  
788 PMID: 16516070.
- 789 **95.** Johnson MD, Meredith LS, Hickey SC, Wells KB. Influence of patient preference and primary  
790 care clinician proclivity for watchful waiting on receipt of depression treatment. *Gen Hosp*  
791 *Psychiatry.* 2006; 28:379–86. doi: 10.1016/j.genhosppsy.2006.07.006 PMID: 16950372.
- 792 **96.** Dobscha SK, Corson K, Gerrity MS. Depression treatment preferences of VA primary care  
793 patients. *Psychosomatics.* 2007; 48:482–8. doi: 10.1176/appi.psy.48.6.482 PMID: 18071094.
- 794 **97.** Hodges L, Butcher I, Kleiboer A, McHugh G, Murray G, Walker J, et al. Patient and general  
795 practitioner preferences for the treatment of depression in patients with cancer: how, who,  
796 and where. *J Psychosom Res.* 2009; 67:399–402. Epub 2009/04/24.  
797 doi: 10.1016/j.jpsychores.2009.03.008 PMID: 19837202.
- 798 **98.** Dwight Johnson M, Apesoa-Varano C, Hay J, Unutzer J, Hinton L. Depression treatment  
799 preferences of older white and Mexican origin men. *Gen Hosp Psychiatry.* 2013; 35:59–65.  
800 Epub 2012/11/06. doi: 10.1016/j.genhosppsy.2012.08.003 PMID: 23141027.
- 801 **99.** Waltz TJ, Campbell DG, Kirchner JE, Lombardero A, Bolkan C, Zivin K, et al. Veterans with  
802 depression in primary care: provider preferences, matching, and care satisfaction. *Fam Syst*  
803 *Health.* 2014; 32:367–77. Epub 2014/08/04. doi: 10.1037/fsh0000071 PMID: 25090611.

- 804 **100.** Magnani M, Sasdelli A, Bellino S, Bellomo A, Carpiello B, Politi P, et al. Treating Depression:  
805 What Patients Want; Findings From a Randomized Controlled Trial in Primary Care.  
806 Psychosomatics. 2016; 57:616–23. Epub 2016/05/13. doi: 10.1016/j.psym.2016.05.004 PMID:  
807 27393388.
- 808 **101.** Davis TD, Campbell DG, Bonner LM, Bolkan CR, Lanto A, Chaney EF, et al. Women Veterans with  
809 Depression in Veterans Health Administration Primary Care: An Assessment of Needs and  
810 Preferences. Womens Health Issues. 2016; 26:656–66. Epub 2016/09/30.  
811 doi: 10.1016/j.whi.2016.08.001 PMID: 27697494.
- 812 **102.** Avey JP, Dirks LG, Dillard DA, Manson SM, Merrick M, Smith JJ, et al. Depression management  
813 interests among Alaska Native and American Indian adults in primary care. J Affect Disord.  
814 2018; 239:214–9. Epub 2018/06/07. doi: 10.1016/j.jad.2018.05.075 PMID: 30025310.
- 815 **103.** Backhaus L, Pabst A, Löbner M, Riedel-Heller S, Luppä M. Behandlungspräferenzen depressiver  
816 Allgemeinartzpatienten. Psychiatr Prax. 2020; 47:39–42. Epub 2019/08/14. doi: 10.1055/a-  
817 0961-1628 PMID: 31412368.
- 818 **104.** Dorow M, Löbner M, Pabst A, Stein J, Riedel-Heller SG. Preferences for Depression Treatment  
819 Including Internet-Based Interventions: Results From a Large Sample of Primary Care Patients.  
820 Front Psychiatry. 2018; 9:181. Epub 2018/05/17. doi: 10.3389/fpsy.2018.00181 PMID:  
821 29867605.
- 822 **105.** Winklerfelt Hammarberg S af, Björkelund C, Nejati S, Magnil M, Hange D, Svenningsson I, et al.  
823 Clinical effectiveness of care managers in collaborative primary health care for patients with  
824 depression: 12- and 24-month follow-up of a pragmatic cluster randomized controlled trial.  
825 BMC Prim Care. 2022; 23:198. Epub 2022/08/09. doi: 10.1186/s12875-022-01803-x PMID:  
826 35945493.
- 827 **106.** Johnson DA. Treatment of depression in general practice. Br Med J. 1973; 2:18–20.  
828 doi: 10.1136/bmj.2.5857.18 PMID: 4695689.
- 829 **107.** Scott AI, Freeman CP. Edinburgh primary care depression study: treatment outcome, patient  
830 satisfaction, and cost after 16 weeks. BMJ. 1992; 304:883–7. doi: 10.1136/bmj.304.6831.883  
831 PMID: 1392754.
- 832 **108.** Gilmore KA, Hargie O. Quality issues in the treatment of depression in general practice. Int J  
833 Health Care Qual Assur Inc Leadersh Health Serv. 2000; 13:34–41.  
834 doi: 10.1108/09526860010311071 PMID: 11183226.
- 835 **109.** Meredith LS, Orlando M, Humphrey N, Camp P, Sherbourne CD. Are better ratings of the  
836 patient-provider relationship associated with higher quality care for depression. Med Care.  
837 2001; 39:349–60. doi: 10.1097/00005650-200104000-00006 PMID: 11329522.
- 838 **110.** Webster J, Pritchard MA, Linnane JW, Roberts JA, Hinson JK, Starrenburg SE. Postnatal  
839 depression: use of health services and satisfaction with health-care providers. J Qual Clin Pract.  
840 2001; 21:144–8. doi: 10.1046/j.1440-1762.2001.00432.x PMID: 11856412.
- 841 **111.** Orlando M, Meredith LS. Understanding the causal relationship between patient-reported  
842 interpersonal and technical quality of care for depression. Med Care. 2002; 40:696–704.  
843 doi: 10.1097/00005650-200208000-00009 PMID: 12187183.
- 844 **112.** Solberg LI, Fischer LR, Rush WA, Wei F. When depression is the diagnosis, what happens to  
845 patients and are they satisfied. Am J Manag Care. 2003; 9:131–40.
- 846 **113.** Mellor D, Davison T, McCabe M, Kuruvilla G, Moore K, Ski C. Satisfaction with general  
847 practitioner treatment of depression among residents of aged care facilities. J Aging Health.  
848 2006; 18:435–57. doi: 10.1177/0898264306286199 PMID: 16648395.
- 849 **114.** DeJesus RS, Howell L, Williams M, Hathaway J, Vickers KS. Collaborative care management  
850 effectively promotes self-management: patient evaluation of care management for depression

- 851 in primary care. *Postgrad Med.* 2014; 126:141–6. doi: 10.3810/pgm.2014.03.2750 PMID:  
852 24685978.
- 853 **115.** Edwards L, Thomas C, Gregory A, Yardley L, O’Cathain A, Montgomery AA, et al. Are people  
854 with chronic diseases interested in using telehealth? A cross-sectional postal survey. *J Med*  
855 *Internet Res.* 2014; 16:e123. Epub 2014/05/08. doi: 10.2196/jmir.3257 PMID: 24811914.
- 856 **116.** Aragonès E, Rambla C, López-Cortacans G, Tomé-Pires C, Sánchez-Rodríguez E, Caballero A, et  
857 al. Effectiveness of a collaborative care intervention for managing major depression and  
858 chronic musculoskeletal pain in primary care: A cluster-randomised controlled trial. *J Affect*  
859 *Disord.* 2019; 252:221–9. Epub 2019/04/08. doi: 10.1016/j.jad.2019.04.004 PMID: 30986737.
- 860 **117.** Saur CD, Steffens DC, Harpole LH, Fan M-Y, Oddone EZ, Unützer J. Satisfaction and Outcomes of  
861 Depressed Older Adults With Psychiatric Clinical Nurse Specialists in Primary Care. *J Am*  
862 *Psychiatr Nurses Assoc.* 2007; 13:62–70. doi: 10.1177/1078390307301938.
- 863 **118.** Pitrou I, Berbiche D, Vasiliadis H-M. Mental health and satisfaction with primary care services in  
864 older adults: a study from the patient perspective on four dimensions of care. *Fam Pract.* 2020;  
865 37:459–64. doi: 10.1093/fampra/cmaa019 PMID: 32201895.
- 866 **119.** Green BL, Watson MR, Kaltman SI, Serrano A, Talisman N, Kirkpatrick L, et al. Knowledge and  
867 Preferences Regarding Antidepressant Medication Among Depressed Latino Patients in Primary  
868 Care. *The Journal of nervous and mental disease.* 2017; 205:952–9.  
869 doi: 10.1097/NMD.0000000000000754 PMID: 29076955.
- 870 **120.** Lee King PA, Cederbaum JA, Kurzban S, Norton T, Palmer SC, Coyne JC. Role of patient  
871 treatment beliefs and provider characteristics in establishing patient-provider relationships.  
872 *Fam Pract.* 2015; 32:224–31. Epub 2015/01/01. doi: 10.1093/fampra/cmu085 PMID: 25556196.
- 873 **121.** Horevitz E, Organista KC, Arean PA. Depression Treatment Uptake in Integrated Primary Care:  
874 How a "Warm Handoff" and Other Factors Affect Decision Making by Latinos. *Psychiatr Serv.*  
875 2015; 66:824–30. Epub 2015/04/15. doi: 10.1176/appi.ps.201400085 PMID: 25873022.
- 876 **122.** Newman C, Kippax S, Mao L, Saltman D, Kidd M. Roles ascribed to general practitioners by gay  
877 men with depression. *Aust Fam Physician.* 2010; 39:667–71.
- 878 **123.** Nichols GA, Brown JB. Following depression in primary care: do family practice physicians ask  
879 about depression at different rates than internal medicine physicians. *Arch Fam Med.* 2000;  
880 9:478–82. doi: 10.1001/archfami.9.5.478 PMID: 10810955.
- 881 **124.** Pollock K. Maintaining face in the presentation of depression: constraining the therapeutic  
882 potential of the consultation. *Health (London).* 2007; 11:163–80.  
883 doi: 10.1177/1363459307074692 PMID: 17344270.
- 884 **125.** Sternke EA, Abrahamson K, Bair MJ. Comorbid Chronic Pain and Depression: Patient  
885 Perspectives on Empathy. *Pain Manag Nurs.* 2016; 17:363–71. Epub 2016/10/19.  
886 doi: 10.1016/j.pmn.2016.07.003 PMID: 27769812.
- 887 **126.** Gartland D, Hegarty K, Papadopoulos S, Brown S. Patterns of health service utilisation of  
888 mothers experiencing mental health problems and intimate partner violence: Ten-year follow-  
889 up of an Australian prospective mother and child cohort. *PLoS One.* 2022; 17:e0269626. Epub  
890 2022/06/15. doi: 10.1371/journal.pone.0269626 PMID: 35704627.
- 891 **127.** van Voorhees BW, Cooper LA, Rost KM, Nutting P, Rubenstein LV, Meredith L, et al. Primary  
892 care patients with depression are less accepting of treatment than those seen by mental health  
893 specialists. *J Gen Intern Med.* 2003; 18:991–1000. doi: 10.1111/j.1525-1497.2003.21060.x  
894 PMID: 14687257.
- 895 **128.** Johnston O, Kumar S, Kendall K, Peveler R, Gabbay J, Kendrick T. Qualitative study of depression  
896 management in primary care: GP and patient goals, and the value of listening. *Br J Gen Pract.*  
897 2007; 57:872–9. doi: 10.3399/096016407782318026 PMID: 17976282.

- 898 **129.** Wittkampf KA, van Zwieten M, Smits FT, Schene AH, Huyser J, van Weert HC. Patients' view on  
899 screening for depression in general practice. *Fam Pract.* 2008; 25:438–44. Epub 2008/10/03.  
900 doi: 10.1093/fampra/cm057 PMID: 18836095.
- 901 **130.** Andrews G, Carter GL. What people say about their general practitioners' treatment of anxiety  
902 and depression. *Med J Aust.* 2001; 175:S48-51. doi: 10.5694/j.1326-5377.2002.tb04287.x PMID:  
903 11556437.
- 904 **131.** Prins MA, Verhaak PFM, van der Meer K, Penninx BWJH, Bensing JM. Primary care patients with  
905 anxiety and depression: need for care from the patient's perspective. *J Affect Disord.* 2009;  
906 119:163–71. Epub 2009/05/05. doi: 10.1016/j.jad.2009.03.019 PMID: 19419771.
- 907 **132.** Prins M, Bosmans J, Verhaak P, van der Meer K, van Tulder M, van Marwijk H, et al. The costs of  
908 guideline-concordant care and of care according to patients' needs in anxiety and depression. *J*  
909 *Eval Clin Pract.* 2011; 17:537–46. Epub 2010/06/25. doi: 10.1111/j.1365-2753.2010.01490.x  
910 PMID: 20586845.
- 911 **133.** Katon W, Korff M von, Lin E, Walker E, Simon GE, Bush T, et al. Collaborative management to  
912 achieve treatment guidelines. Impact on depression in primary care. *JAMA.* 1995; 273:1026–31.
- 913 **134.** Gask L, Rogers A, Oliver D, May C, Roland M. Qualitative study of patients' perceptions of the  
914 quality of care for depression in general practice. *Br J Gen Pract.* 2003; 53:278–83.
- 915 **135.** Rossom RC, Solberg LI, Vazquez-Benitez G, Crain AL, Beck A, Whitebird R, et al. The effects of  
916 patient-centered depression care on patient satisfaction and depression remission. *Fam Pract.*  
917 2016; 33:649–55. Epub 2016/08/17. doi: 10.1093/fampra/cm068 PMID: 27535330.
- 918 **136.** Badger F, Nolan P. Attributing recovery from depression. Perceptions of people cared for in  
919 primary care. *J Clin Nurs.* 2007; 16:25–34. doi: 10.1111/j.1365-2702.2006.01581.x PMID:  
920 17518866.
- 921 **137.** Hansson M, Chotai J, Bodlund O. What made me feel better? Patients' own explanations for the  
922 improvement of their depression. *Nord J Psychiatry.* 2012; 66:290–6. Epub 2012/01/03.  
923 doi: 10.3109/08039488.2011.644807 PMID: 22211274.
- 924 **138.** Canty HR, Sauter A, Zuckerman K, Cobian M, Grigsby T. Mothers' Perspectives on Follow-up for  
925 Postpartum Depression Screening in Primary Care. *J Dev Behav Pediatr.* 2019; 40:139–43.  
926 doi: 10.1097/DBP.0000000000000628 PMID: 30422838.
- 927 **139.** Poole L, Frost R, Rowlands H, Black G. Experience of depression in older adults with and without  
928 a physical long-term condition: findings from a qualitative interview study. *BMJ Open.* 2022;  
929 12:e056566. Epub 2022/02/24. doi: 10.1136/bmjopen-2021-056566 PMID: 35210344.
- 930 **140.** Manning C, Marr J. 'Real-life burden of depression' surveys--GP and patient perspectives on  
931 treatment and management of recurrent depression. *Curr Med Res Opin.* 2003; 19:526–31.  
932 doi: 10.1185/030079903125002117 PMID: 14594525.
- 933 **141.** Arve S, Lauri S, Lehtonen A, Tilvis RS. Patient's and general practitioner's different views on  
934 patient's depression. *Arch Gerontol Geriatr.* 1999; 28:247–57. doi: 10.1016/s0167-  
935 4943(99)00012-6 PMID: 15374086.
- 936 **142.** Izquierdo A, Sarkisian C, Ryan G, Wells KB, Miranda J. Older depressed Latinos' experiences with  
937 primary care visits for personal, emotional and/or mental health problems: a qualitative  
938 analysis. *Ethn Dis.* 2014; 24:84–91.
- 939 **143.** Jones AL, Mor MK, Haas GL, Gordon AJ, Cashy JP, Schaefer JH, et al. The Role of Primary Care  
940 Experiences in Obtaining Treatment for Depression. *J Gen Intern Med.* 2018; 33:1366–73. Epub  
941 2018/06/08. doi: 10.1007/s11606-018-4522-7 PMID: 29948804.
- 942 **144.** Knowles SE, Lovell K, Bower P, Gilbody S, Littlewood E, Lester H. Patient experience of  
943 computerised therapy for depression in primary care. *BMJ Open.* 2015; 5:e008581. Epub  
944 2015/11/30. doi: 10.1136/bmjopen-2015-008581 PMID: 26621513.

- 945 **145.** Templeton L, Velleman R, Persaud A, Milner P. The experiences of postnatal depression in  
946 women from black and minority ethnic communities in Wiltshire, UK. *Ethn Health*. 2003; 8:207–  
947 21. doi: 10.1080/1355785032000136425 PMID: 14577996.
- 948 **146.** Barg FK, Mavandadi S, Givens JL, Knott K, Zubritsky C, Oslin DW. When late-life depression  
949 improves: what do older patients say about their treatment. *Am J Geriatr Psychiatry*. 2010;  
950 18:596–605. doi: 10.1097/jgp.0b013e3181b7f0f9 PMID: 20593539.
- 951 **147.** Holopainen D. The experience of seeking help for postnatal depression. *Aust J Adv Nurs*. 2002;  
952 19:39–44.
- 953 **148.** Calderón Gómez C, Retolaza Balsategui A, Payo Gordon J, La Bacigalupe De Hera A, Zallo  
954 Atxutegi E, Mosquera Metcalfe I. Perspectivas de los pacientes diagnosticados de depresión y  
955 atendidos por médicos de familia y psiquiatras. *Aten Primaria*. 2012; 44:595–602. Epub  
956 2012/05/08. doi: 10.1016/j.aprim.2012.02.009 PMID: 22575484.
- 957 **149.** Fosgerau CF, Davidsen AS. Patients' perspectives on antidepressant treatment in consultations  
958 with physicians. *Qual Health Res*. 2014; 24:641–53. Epub 2014/04/08.  
959 doi: 10.1177/1049732314528813 PMID: 24714618.
- 960 **150.** Wikberg C, Pettersson A, Westman J, Björkelund C, Petersson E-L. Patients' perspectives on the  
961 use of the Montgomery-Asberg depression rating scale self-assessment version in primary care.  
962 *Scand J Prim Health Care*. 2016; 34:434–42. Epub 2016/11/02.  
963 doi: 10.1080/02813432.2016.1248635 PMID: 27804312.
- 964 **151.** Malpass A, Shaw A, Kessler D, Sharp D. Concordance between PHQ-9 scores and patients'  
965 experiences of depression: a mixed methods study. *Br J Gen Pract*. 2010; 60:e231-8.  
966 doi: 10.3399/bjgp10X502119 PMID: 20529486.
- 967 **152.** Gensichen J, Guethlin C, Sarmand N, Sivakumaran D, Jäger C, Mergenthal K, et al. Patients'  
968 perspectives on depression case management in general practice - a qualitative study. *Patient*  
969 *Educ Couns*. 2012; 86:114–9. Epub 2011/04/06. doi: 10.1016/j.pec.2011.02.020 PMID:  
970 21474266.
- 971 **153.** Knowles SE, Chew-Graham C, Adeyemi I, Coupe N, Coventry PA. Managing depression in people  
972 with multimorbidity: a qualitative evaluation of an integrated collaborative care model. *BMC*  
973 *Fam Pract*. 2015; 16:32. Epub 2015/03/05. doi: 10.1186/s12875-015-0246-5 PMID: 25886864.
- 974 **154.** Taylor AK, Gilbody S, Bosanquet K, Overend K, Della Bailey, Foster D, et al. How should we  
975 implement collaborative care for older people with depression? A qualitative study using  
976 normalisation process theory within the CASPER plus trial. *BMC Fam Pract*. 2018; 19:116. Epub  
977 2018/07/18. doi: 10.1186/s12875-018-0813-7 PMID: 30021506.
- 978 **155.** Richards JE, Hohl SD, Whiteside U, Ludman EJ, Grossman DC, Simon GE, et al. If You Listen, I  
979 Will Talk: the Experience of Being Asked About Suicidality During Routine Primary Care. *J Gen*  
980 *Intern Med*. 2019; 34:2075–82. Epub 2019/07/25. doi: 10.1007/s11606-019-05136-x PMID:  
981 31346911.
- 982 **156.** Rogers A, May C, Oliver D. Experiencing depression, experiencing the depressed: The separate  
983 worlds of patients and doctors. *J Mental Health*. 2001; 10:317–33.  
984 doi: 10.1080/09638230020023840.
- 985 **157.** Bennett M, Walters K, Drennan V, Buszewicz M. Structured pro-active care for chronic  
986 depression by practice nurses in primary care: a qualitative evaluation. *PLoS One*. 2013;  
987 8:e75810. Epub 2013/09/12. doi: 10.1371/journal.pone.0075810 PMID: 24069451.
- 988 **158.** Grung I, Anderssen N, Haukenes I, Ruths S, Smith-Sivertsen T, Hetlevik Ø, et al. Patient  
989 experiences with depression care in general practice: a qualitative questionnaire study. *Scand J*  
990 *Prim Health Care*. 2022; 40:253–60. Epub 2022/05/23. doi: 10.1080/02813432.2022.2074069  
991 PMID: 35603990.

- 992 **159.** Mohr DC, Hart SL, Howard I, Julian L, Vella L, Catledge C, et al. Barriers to psychotherapy among  
993 depressed and nondepressed primary care patients. *Ann Behav Med.* 2006; 32:254–8.  
994 doi: 10.1207/s15324796abm3203\_12 PMID: 17107299.
- 995 **160.** Chew-Graham C, Kovandžić M, Gask L, Burroughs H, Clarke P, Sanderson H, et al. Why may  
996 older people with depression not present to primary care? Messages from secondary analysis  
997 of qualitative data. *Health Soc Care Community.* 2012; 20:52–60. Epub 2011/07/12.  
998 doi: 10.1111/j.1365-2524.2011.01015.x PMID: 21749528.
- 999 **161.** Bell RA, Franks P, Duberstein PR, Epstein RM, Feldman MD, Fernandez y Garcia E, et al.  
1000 Suffering in silence: reasons for not disclosing depression in primary care. *Ann Fam Med.* 2011;  
1001 9:439–46. doi: 10.1370/afm.1277 PMID: 21911763.
- 1002 **162.** Keller AO, Valdez CR, Schwei RJ, Jacobs EA. Disclosure of Depression in Primary Care: A  
1003 Qualitative Study of Women's Perceptions. *Womens Health Issues.* 2016; 26:529–36. Epub  
1004 2016/08/13. doi: 10.1016/j.whi.2016.07.002 PMID: 27531601.
- 1005 **163.** Robinson J, Khan N, Fusco L, Malpass A, Lewis G, Dowrick C. Why are there discrepancies  
1006 between depressed patients' Global Rating of Change and scores on the Patient Health  
1007 Questionnaire depression module? A qualitative study of primary care in England. *BMJ Open.*  
1008 2017; 7:e014519. Epub 2017/05/04. doi: 10.1136/bmjopen-2016-014519 PMID: 28473513.
- 1009 **164.** Leydon GM, Rodgers L, Kendrick T. A qualitative study of patient views on discontinuing long-  
1010 term selective serotonin reuptake inhibitors. *Fam Pract.* 2007; 24:570–5. Epub 2007/11/20.  
1011 doi: 10.1093/fampra/cmm069 PMID: 18032401.
- 1012 **165.** Hansen MC, Cabassa LJ. Pathways to depression care: help-seeking experiences of low-income  
1013 Latinos with diabetes and depression. *J Immigr Minor Health.* 2012; 14:1097–106.  
1014 doi: 10.1007/s10903-012-9590-x PMID: 22367667.
- 1015 **166.** Bair MJ, Matthias MS, Nyland KA, Huffman MA, Stubbs DL, Kroenke K, et al. Barriers and  
1016 facilitators to chronic pain self-management: a qualitative study of primary care patients with  
1017 comorbid musculoskeletal pain and depression. *Pain Med.* 2009; 10:1280–90.  
1018 doi: 10.1111/j.1526-4637.2009.00707.x PMID: 19818038.
- 1019 **167.** Loh A, Leonhart R, Wills CE, Simon D, Härter M. The impact of patient participation on  
1020 adherence and clinical outcome in primary care of depression. *Patient Educ Couns.* 2007;  
1021 65:69–78. doi: 10.1016/j.pec.2006.05.007 PMID: 17141112.
- 1022 **168.** Clever SL, Ford DE, Rubenstein LV, Rost KM, Meredith LS, Sherbourne CD, et al. Primary care  
1023 patients' involvement in decision-making is associated with improvement in depression. *Med*  
1024 *Care.* 2006; 44:398–405. doi: 10.1097/01.mlr.0000208117.15531.da PMID: 16641657.
- 1025 **169.** Moise N, Ye S, Alcántara C, Davidson KW, Kronish I. Depressive symptoms and decision-making  
1026 preferences in patients with comorbid illnesses. *J Psychosom Res.* 2017; 92:63–6. Epub  
1027 2015/12/02. doi: 10.1016/j.jpsychores.2015.12.001 PMID: 26682488.
- 1028 **170.** Solberg LI, Crain AL, Rubenstein L, Unützer J, Whitebird RR, Beck A. How much shared decision  
1029 making occurs in usual primary care of depression. *J Am Board Fam Med.* 2014; 27:199–208.  
1030 doi: 10.3122/jabfm.2014.02.130164 PMID: 24610182.
- 1031 **171.** Katon W, Korff M von, Lin E, Lipscomb P, Russo J, Wagner E, et al. Distressed high utilizers of  
1032 medical care. DSM-III-R diagnoses and treatment needs. *Gen Hosp Psychiatry.* 1990; 12:355–62.  
1033 doi: 10.1016/0163-8343(90)90002-t PMID: 2245919.
- 1034 **172.** Callahan CM, Hui SL, Nienaber NA, Musick BS, Tierney WM. Longitudinal study of depression  
1035 and health services use among elderly primary care patients. *J Am Geriatr Soc.* 1994; 42:833–8.  
1036 doi: 10.1111/j.1532-5415.1994.tb06554.x PMID: 8046192.
- 1037 **173.** Ford JD, Trestman RL, Steinberg K, Tennen H, Allen S. Prospective association of anxiety,  
1038 depressive, and addictive disorders with high utilization of primary, specialty and emergency



- 1039 medical care. *Soc Sci Med*. 2004; 58:2145–8. doi: 10.1016/j.socscimed.2003.08.017 PMID:  
1040 15047073.
- 1041 **174.** Shvartzman P, Weiner Z, Vardy D, Friger M, Sherf M, Biderman A. Health services utilization by  
1042 depressive patients identified by the MINI questionnaire in a primary care setting. *Scand J Prim*  
1043 *Health Care*. 2005; 23:18–25. doi: 10.1080/02813430510018383 PMID: 16025869.
- 1044 **175.** Rhodes AE, Bethell J, Bondy SJ. Suicidality, depression, and mental health service use in Canada.  
1045 *Can J Psychiatry*. 2006; 51:35–41. doi: 10.1177/070674370605100107 PMID: 16491982.
- 1046 **176.** Glaesmer H, Gunzelmann T, Martin A, Brähler E, Rief W. Die Bedeutung psychischer  
1047 Beschwerden für die medizinische Inanspruchnahme und das Krankheitsverhalten Alterer.  
1048 *Psychiatr Prax*. 2008; 35:187–93. doi: 10.1055/s-2008-1067367 PMID: 18478502.
- 1049 **177.** Busch MA, Neuner B, Aichberger MC, Hapke U, Riedel-Heller SG, Luppä M. Depressive  
1050 Symptomatik und Inanspruchnahme von Gesundheits- und Pflegeleistungen bei Personen im  
1051 Alter ab 50 Jahren in Deutschland. Ergebnisse einer bevölkerungsbasierten Querschnittstudie.  
1052 *Psychiatr Prax*. 2013; 40:214–9. Epub 2013/03/25. doi: 10.1055/s-0032-1333026 PMID:  
1053 23529658.
- 1054 **178.** Gunn J, Cameron J, Densley K, Davidson S, Fletcher S, Palmer V, et al. Uptake of mental health  
1055 websites in primary care: Insights from an Australian longitudinal cohort study of depression.  
1056 *Patient Educ Couns*. 2018; 101:105–12. Epub 2017/07/11. doi: 10.1016/j.pec.2017.07.008  
1057 PMID: 28739180.
- 1058 **179.** Liu M, McCurry SM, Belza B, Dobra A, Buchanan DT, Vitiello MV, et al. Effects of Osteoarthritis  
1059 Pain and Concurrent Insomnia and Depression on Health Care Use in a Primary Care Population  
1060 of Older Adults. *Arthritis Care Res (Hoboken)*. 2019; 71:748–57. Epub 2019/05/10.  
1061 doi: 10.1002/acr.23695 PMID: 30067892.
- 1062 **180.** Andrew JE, Wileman SM, Howie FL, Cameron IM, Naji SA, Eagles JM. Comparison of  
1063 consultation rates in primary care attenders with and without seasonal affective disorder. *J*  
1064 *Affect Disord*. 2001; 62:199–205. doi: 10.1016/s0165-0327(00)00148-8 PMID: 11223107.
- 1065 **181.** Ronalds C, Kapur N, Stone K, Webb S, Tomenson B, Creed F. Determinants of consultation rate  
1066 in patients with anxiety and depressive disorders in primary care. *Fam Pract*. 2002; 19:23–8.  
1067 doi: 10.1093/fampra/19.1.23 PMID: 11818346.
- 1068 **182.** Menchetti M, Cevenini N, Ronchi D de, Quartesan R, Berardi D. Depression and frequent  
1069 attendance in elderly primary care patients. *Gen Hosp Psychiatry*. 2006; 28:119–24.  
1070 doi: 10.1016/j.genhosppsy.2005.10.007 PMID: 16516061.
- 1071 **183.** Ferrari S, Galeazzi GM, Mackinnon A, Rigatelli M. Frequent attenders in primary care: impact of  
1072 medical, psychiatric and psychosomatic diagnoses. *Psychother Psychosom*. 2008; 77:306–14.  
1073 Epub 2008/07/04. doi: 10.1159/000142523 PMID: 18600036.
- 1074 **184.** Widmer RB, Cadoret RJ. Depression in primary care: changes in pattern of patient visits and  
1075 complaints during a developing depression. *J Fam Pract*. 1978; 7:293–302.
- 1076 **185.** Widmer RB, Cadoret RJ. Depression in family practice: changes in pattern of patient visits and  
1077 complaints during subsequent developing depressions. *J Fam Pract*. 1979; 9:1017–21.
- 1078 **186.** Cadoret RJ, Widmer RB, Troughton EP. Somatic complaints -- harbinger of depression in  
1079 primary care. *J Affect Disord*. 1980; 2:61–70. doi: 10.1016/0165-0327(80)90022-1 PMID:  
1080 6448881.
- 1081 **187.** Wilson DR, Widmer RB, Cadoret RJ, Judiesch K. Somatic symptoms. A major feature of  
1082 depression in a family practice. *J Affect Disord*. 1983; 5:199–207. doi: 10.1016/0165-  
1083 0327(83)90042-3 PMID: 6224832.
- 1084 **188.** Katon W, Rutter CM, Lin E, Simon G, Korff M von, Bush T, et al. Are there detectable differences  
1085 in quality of care or outcome of depression across primary care providers. *Med Care*. 2000;  
1086 38:552–61. doi: 10.1097/00005650-200006000-00002 PMID: 10843308.

- 1087 **189.** Eilat-Tsanani S, Merom A, Romano S, Reshef A, Lavi I, Tabenkin H. The effect of postpartum  
1088 depression on women's consultations with physicians. *Isr Med Assoc J.* 2006; 8:406–10.
- 1089 **190.** Romans-Clarkson SE, Walton VA, Dons DJ, Mullen PE. Which women seek help for their  
1090 psychiatric problems. *N Z Med J.* 1990; 103:445–8.
- 1091 **191.** Arroyo Cardona E, Auquer Framis F, Buñuel Álvarez JC, Rubio Montañés ML, Adalid Villar C,  
1092 Córdón Granados F, et al. Hiperfrecuentación en atención primaria: estudio de los factores  
1093 psicosociales. *Aten Primaria.* 1998; 22:627–30. Available from: [https://www.elsevier.es/es-](https://www.elsevier.es/es-revista-atencion-primaria-27-articulo-hiperfrecuentacion-atencion-primaria-estudio-factores-14986)  
1094 [revista-atencion-primaria-27-articulo-hiperfrecuentacion-atencion-primaria-estudio-factores-](https://www.elsevier.es/es-revista-atencion-primaria-27-articulo-hiperfrecuentacion-atencion-primaria-estudio-factores-14986)  
1095 [14986](https://www.elsevier.es/es-revista-atencion-primaria-27-articulo-hiperfrecuentacion-atencion-primaria-estudio-factores-14986).
- 1096 **192.** Druss BG, Rask K, Katon WJ. Major depression, depression treatment and quality of primary  
1097 medical care. *Gen Hosp Psychiatry.* 2008; 30:20–5. doi: 10.1016/j.genhosppsy.2007.08.015  
1098 PMID: 18164936.
- 1099 **193.** van Geffen ECG, Gardarsdottir H, van Hulten R, van Dijk L, Egberts ACG, Heerdink ER. Initiation  
1100 of antidepressant therapy: do patients follow the GP's prescription. *Br J Gen Pract.* 2009;  
1101 59:81–7. doi: 10.3399/bjgp09X395067 PMID: 19192372.
- 1102 **194.** Larsen KK, Vestergaard CH, Schougaard LMV, Larsen LP, Jessen A, May O, et al. Contacts to  
1103 general practice and antidepressant treatment initiation after screening for anxiety and  
1104 depression in patients with heart disease. *Dan Med J.* 2016; 63.
- 1105 **195.** Menchetti M, Belvederi Murri M, Bertakis K, Bortolotti B, Berardi D. Recognition and treatment  
1106 of depression in primary care: effect of patients' presentation and frequency of consultation. *J*  
1107 *Psychosom Res.* 2009; 66:335–41. Epub 2008/12/16. doi: 10.1016/j.jpsychores.2008.10.008  
1108 PMID: 19302892.
- 1109 **196.** Suija K, Kalda R, Maaroos H-I. Patients with depressive disorder, their co-morbidity, visiting rate  
1110 and disability in relation to self-evaluation of physical and mental health: a cross-sectional  
1111 study in family practice. *BMC Fam Pract.* 2009; 10:38. Epub 2009/06/01. doi: 10.1186/1471-  
1112 2296-10-38 PMID: 19486534.
- 1113 **197.** Vuorilehto MS, Melartin TK, Riihimäki K, Isometsä ET. Pharmacological and psychosocial  
1114 treatment of depression in primary care: Low intensity and poor adherence and continuity. *J*  
1115 *Affect Disord.* 2016; 202:145–52. Epub 2016/05/24. doi: 10.1016/j.jad.2016.05.035 PMID:  
1116 27262636.
- 1117 **198.** Pirard P, Baubet T, Motreff Y, Rabet G, Marillier M, Vandentorren S, et al. Use of mental health  
1118 supports by civilians exposed to the November 2015 terrorist attacks in Paris. *BMC Health Serv*  
1119 *Res.* 2020; 20:959. Epub 2020/10/20. doi: 10.1186/s12913-020-05785-3 PMID: 33076901.
- 1120 **199.** Gomà-I-Freixanet M, Calvo-Rojas V, Portell M. Psychosocial characteristics and affective  
1121 symptomatology associated with patient self-initiated consultations in Spanish general practice.  
1122 *Health Soc Care Community.* 2020; 28:2312–9. Epub 2020/06/08. doi: 10.1111/hsc.13052  
1123 PMID: 32511850.
- 1124 **200.** Oxman TE, Harrigan J, Kues J. Diagnostic patterns of family physicians for somatoform,  
1125 depressive, and anxiety disorders. *J Fam Pract.* 1983; 17:439–46.
- 1126 **201.** Katon W, Berg AO, Robins AJ, Risse S. Depression--medical utilization and somatization. *West J*  
1127 *Med.* 1986; 144:564–8.
- 1128 **202.** Karlsson H, Lehtinen V, Joukamaa M. Psychiatric morbidity among frequent attender patients in  
1129 primary care. *Gen Hosp Psychiatry.* 1995; 17:19–25. doi: 10.1016/0163-8343(94)00059-m  
1130 PMID: 7737490.
- 1131 **203.** Yamada K, Maeno T, Ono M, Sato T, Otsubo T, Isse K. Depression in a family practice in Japan:  
1132 doctor shopping and patient complaints. *Prim Care Psych.* 2005; 10:7–12.  
1133 doi: 10.1185/135525705X40355.

- 1134 **204.** Al-Windi A. The influence of complaint symptoms on health care utilisation, medicine use, and  
1135 sickness absence. A comparison between retrospective and prospective utilisation. *J*  
1136 *Psychosom Res.* 2005; 59:139–46. doi: 10.1016/j.jpsychores.2005.02.012 PMID: 16198186.
- 1137 **205.** Patel S, Kai J, Atha C, Avery A, Guo B, James M, et al. Clinical characteristics of persistent  
1138 frequent attenders in primary care: case-control study. *Fam Pract.* 2015; 32:624–30. Epub  
1139 2015/10/08. doi: 10.1093/fampra/cmz076 PMID: 26450918.
- 1140 **206.** Carmassi C, Dell'Oste V, Ceresoli D, Moscardini S, Bianchi E, Landi R, et al. Frequent attenders in  
1141 general medical practice in Italy: a preliminary report on clinical variables related to low  
1142 functioning. *Neuropsychiatr Dis Treat.* 2019; 15:115–25. Epub 2018/12/24.  
1143 doi: 10.2147/NDT.S179013 PMID: 30636877.
- 1144 **207.** McKelvey RS, Pfaff JJ, Acres JG. The relationship between chief complaints, psychological  
1145 distress, and suicidal ideation in 15-24-year-old patients presenting to general practitioners.  
1146 *Med J Aust.* 2001; 175:550–2. doi: 10.5694/j.1326-5377.2001.tb143718.x PMID: 11795548.
- 1147 **208.** Cremniter D, Delcros J, Guelfi JD, Fermanian J. Une enquête sur les états dépressifs en  
1148 médecine générale. *Encephale.* 1982; 8:523–37.
- 1149 **209.** Williamson PS, Yates WR. The initial presentation of depression in family practice and  
1150 psychiatric outpatients. *Gen Hosp Psychiatry.* 1989; 11:188-93; discussion 216-21.  
1151 doi: 10.1016/0163-8343(89)90040-6 PMID: 2721942.
- 1152 **210.** Gerber PD, Barrett JE, Barrett JA, Oxman TE, Manheimer E, Smith R, et al. The relationship of  
1153 presenting physical complaints to depressive symptoms in primary care patients. *J Gen Intern*  
1154 *Med.* 1992; 7:170–3. doi: 10.1007/BF02598007 PMID: 1487765.
- 1155 **211.** Cornwell J, Hull S. Do GPs prescribe antidepressants differently for South Asian patients. *Fam*  
1156 *Pract.* 1998; 15 Suppl 1:S16-8.
- 1157 **212.** Diamond EL, Gage L, Epting R. Symptoms associated with the diagnosis and treatment of  
1158 depression in family practice. *Fam Pract Res J.* 1987; 6:206–14.
- 1159 **213.** Kirmayer LJ, Robbins JM, Dworkind M, Yaffe MJ. Somatization and the recognition of  
1160 depression and anxiety in primary care. *AJP.* 1993; 150:734–41. doi: 10.1176/ajp.150.5.734  
1161 PMID: 8480818.
- 1162 **214.** Tylee A, Freeling P, Kerry S, Burns T. How does the content of consultations affect the  
1163 recognition by general practitioners of major depression in women. *Br J Gen Pract.* 1995;  
1164 45:575–8.
- 1165 **215.** Damush TM, Wu J, Bair MJ, Sutherland JM, Kroenke K. Self-management practices among  
1166 primary care patients with musculoskeletal pain and depression. *J Behav Med.* 2008; 31:301–7.  
1167 Epub 2008/06/14. doi: 10.1007/s10865-008-9156-5 PMID: 18553130.
- 1168 **216.** Foster JM, Gallagher D. An exploratory study comparing depressed and nondepressed elders'  
1169 coping strategies. *J Gerontol.* 1986; 41:91–3. doi: 10.1093/geronj/41.1.91 PMID: 3941263.
- 1170 **217.** Osei-Bonsu PE, Bokhour BG, Glickman ME, Rodrigues S, Mueller NM, Dell NS, et al. The role of  
1171 coping in depression treatment utilization for VA primary care patients. *Patient Educ Couns.*  
1172 2014; 94:396–402. Epub 2013/11/05. doi: 10.1016/j.pec.2013.10.021 PMID: 24315160.
- 1173 **218.** Badger F, Nolan P. Use of self-chosen therapies by depressed people in primary care. *J Clin*  
1174 *Nurs.* 2007; 16:1343–52. doi: 10.1111/j.1365-2702.2007.01769.x PMID: 17584353.
- 1175 **219.** Bazargan M, Ani CO, Hindman DW, Bazargan-Hejazi S, Baker RS, Bell D, et al. Correlates of  
1176 complementary and alternative medicine utilization in depressed, underserved african  
1177 american and Hispanic patients in primary care settings. *J Altern Complement Med.* 2008;  
1178 14:537–44. doi: 10.1089/acm.2007.0821 PMID: 18537468.
- 1179 **220.** Magnezi R, Glasser S, Shalev H, Sheiber A, Reuveni H. Patient activation, depression and quality  
1180 of life. *Patient Educ Couns.* 2014; 94:432–7. Epub 2013/11/05. doi: 10.1016/j.pec.2013.10.015  
1181 PMID: 24331277.

- 1182 **221.** Dowrick C, Kokanovic R, Hegarty K, Griffiths F, Gunn J. Resilience and depression: perspectives  
1183 from primary care. *Health (London)*. 2008; 12:439–52. doi: 10.1177/1363459308094419 PMID:  
1184 18818274.
- 1185 **222.** Pung A, Fletcher SL, Gunn JM. Mobile App Use by Primary Care Patients to Manage Their  
1186 Depressive Symptoms: Qualitative Study. *J Med Internet Res*. 2018; 20:e10035. Epub  
1187 2018/09/27. doi: 10.2196/10035 PMID: 30262449.
- 1188 **223.** Faber M von, van der Geest G, van der Weele GM, Blom JW, van der Mast RC, Reis R, et al.  
1189 Older people coping with low mood: a qualitative study. *Int Psychogeriatr*. 2016; 28:603–12.  
1190 Epub 2015/12/17. doi: 10.1017/S1041610215002264 PMID: 26674197.
- 1191 **224.** Kloppe T, Pohontsch NJ, Scherer M. Types of Utilization and Types of Treatment Response in a  
1192 Collaborative Care Approach for Depressive Disorders in Old Age in Primary Care. *Front*  
1193 *Psychiatry*. 2020; 11:565929. Epub 2020/10/23. doi: 10.3389/fpsyt.2020.565929 PMID:  
1194 33192688.
- 1195 **225.** Lin EH, Korff M von, Katon W, Bush T, Simon GE, Walker E, et al. The role of the primary care  
1196 physician in patients' adherence to antidepressant therapy. *Med Care*. 1995; 33:67–74.  
1197 doi: 10.1097/00005650-199501000-00006 PMID: 7823648.
- 1198 **226.** Brook OH, van Hout H, Stalman W, Nieuwenhuysen H, Bakker B, Heerdink E, et al. A pharmacy-  
1199 based coaching program to improve adherence to antidepressant treatment among primary  
1200 care patients. *Psychiatr Serv*. 2005; 56:487–9. doi: 10.1176/appi.ps.56.4.487 PMID: 15812103.
- 1201 **227.** Bogner HR, Lin JY, Morales KH. Patterns of early adherence to the antidepressant citalopram  
1202 among older primary care patients: the prospect study. *Int J Psychiatry Med*. 2006; 36:103–19.  
1203 doi: 10.2190/DJH3-Y4R0-R3KG-JYCC PMID: 16927582.
- 1204 **228.** Akerblad A-C, Bengtsson F, Knorrning L von, Ekselius L. Response, remission and relapse in  
1205 relation to adherence in primary care treatment of depression: a 2-year outcome study. *Int Clin*  
1206 *Psychopharmacol*. 2006; 21:117–24. doi: 10.1097/01.yic.0000199452.16682.b8 PMID:  
1207 16421464.
- 1208 **229.** Knorrning L von, Akerblad A-C, Bengtsson F, Carlsson A, Ekselius L. Cost of depression: effect of  
1209 adherence and treatment response. *Eur Psychiatry*. 2006; 21:349–54. Epub 2006/06/13.  
1210 doi: 10.1016/j.eurpsy.2006.04.005 PMID: 16777385.
- 1211 **230.** Kales HC, Nease DE, Sirey JA, Zivin K, Kim HM, Kavanagh J, et al. Racial differences in adherence  
1212 to antidepressant treatment in later life. *Am J Geriatr Psychiatry*. 2013; 21:999–1009. Epub  
1213 2013/02/06. doi: 10.1016/j.jagp.2013.01.046 PMID: 23602306.
- 1214 **231.** Demyttenaere K, Enzlin P, Dewé W, Boulanger B, Bie J de, Troyer W de, et al. Compliance with  
1215 antidepressants in a primary care setting, 1: Beyond lack of efficacy and adverse events. *J Clin*  
1216 *Psychiatry*. 2001; 62 Suppl 22:30–3.
- 1217 **232.** Dernovsek MZ, Tavcar R, Sajovic M. Observation of treatment of depression in primary care  
1218 setting in first week - what happens in first week of treatment with antidepressants. *Psychiatr*  
1219 *Danub*. 2008; 20:227–30.
- 1220 **233.** Hérique A, Kahn J-P. Réalités et recommandations dans la prescription et l'observance des  
1221 antidépresseurs en médecine générale : évaluation des pratiques dans le traitement de la  
1222 dépression en Lorraine et Champagne-Ardenne. *Encephale*. 2009; 35:73–9. Epub 2008/05/16.  
1223 doi: 10.1016/j.encep.2007.12.010 PMID: 19250997.
- 1224 **234.** Ruoff G. A method that dramatically improves patient adherence to depression treatment. *J*  
1225 *Fam Pract*. 2005; 54:846–52.
- 1226 **235.** Harrison P, Carr E, Goldsmith K, Young A, Ashworth M, Fennema D, et al. Antidepressant  
1227 Advisor (ADeSS): a decision support system for antidepressant treatment for depression in UK  
1228 primary care - a feasibility study. *BMJ Open*. 2023; 13:e060516. Epub 2023/03/03.  
1229 doi: 10.1136/bmjopen-2021-060516 PMID: 36868594.

- 1230 **236.** Jeffery A, Bhanu C, Walters K, Wong IC, Osborn D, Hayes JF. Polypharmacy and antidepressant  
1231 acceptability in comorbid depression and type 2 diabetes: a cohort study using UK primary care  
1232 data. *Br J Gen Pract.* 2023; 73:e392-e398. Epub 2023/04/27. doi: 10.3399/BJGP.2022.0295  
1233 PMID: 37105749.
- 1234 **237.** van Hook MP. Women's help-seeking patterns for depression. *Soc Work Health Care.* 1999;  
1235 29:15–34. doi: 10.1300/J010v29n01\_02 PMID: 10482127.
- 1236 **238.** Holloway EE, Sturrock BA, Lamoureux EL, Keeffe JE, Rees G. Help seeking among vision-  
1237 impaired adults referred to their GP for depressive symptoms: patient characteristics and  
1238 outcomes associated with referral uptake. *Aust J Prim Health.* 2015; 21:169–75.  
1239 doi: 10.1071/py13085 PMID: 26509203.
- 1240 **239.** Gormley N, O'Leary D. Time to initial medical presentation in a first-admission group with  
1241 depression. *Acta Psychiatr Scand.* 1998; 97:166–7. doi: 10.1111/j.1600-0447.1998.tb09981.x  
1242 PMID: 9517913.
- 1243 **240.** Shin JK. Help-seeking behaviors by Korean immigrants for depression. *Issues Ment Health Nurs.*  
1244 2002; 23:461–76. doi: 10.1080/01612840290052640 PMID: 12079599.
- 1245 **241.** Lawrence V, Banerjee S, Bhugra D, Sangha K, Turner S, Murray J. Coping with depression in later  
1246 life: a qualitative study of help-seeking in three ethnic groups. *Psychol Med.* 2006; 36:1375–83.  
1247 Epub 2006/07/20. doi: 10.1017/S0033291706008117 PMID: 16854247.
- 1248 **242.** Callister LC, Beckstrand RL, Corbett C. Postpartum depression and help-seeking behaviors in  
1249 immigrant Hispanic women. *J Obstet Gynecol Neonatal Nurs.* 2011; 40:440–9. Epub  
1250 2011/06/03. doi: 10.1111/j.1552-6909.2011.01254.x PMID: 21639863.
- 1251 **243.** Waitzfelder B, Stewart C, Coleman KJ, Rossom R, Ahmedani BK, Beck A, et al. Treatment  
1252 Initiation for New Episodes of Depression in Primary Care Settings. *J Gen Intern Med.* 2018;  
1253 33:1283–91. Epub 2018/02/08. doi: 10.1007/s11606-017-4297-2 PMID: 29423624.
- 1254 **244.** Cornwell BL, Szymanski BR, Bohnert KM, McCarthy JF. Treatment Initiation Following Positive  
1255 Depression Screens in Primary Care: a Propensity Score-Weighted Analysis of Integrated Mental  
1256 Health Services. *J Gen Intern Med.* 2021; 36:561–3. Epub 2020/06/03. doi: 10.1007/s11606-  
1257 020-05694-5 PMID: 32495097.
- 1258 **245.** O'Connor DW, Rosewarne R, Bruce A. Depression in primary care. 1: elderly patients' disclosure  
1259 of depressive symptoms to their doctors. *Int Psychogeriatr.* 2001; 13:359–65.  
1260 doi: 10.1017/s1041610201007748 PMID: 11768382.
- 1261 **246.** Blanchard MR, Waterreus A, Mann AH. The nature of depression among older people in inner  
1262 London, and the contact with primary care. *Br J Psychiatry.* 1994; 164:396–402.  
1263 doi: 10.1192/bjp.164.3.396 PMID: 8199793.
- 1264 **247.** Corrigan PW, Swantek S, Watson AC, Kleinlein P. When do older adults seek primary care  
1265 services for depression. *The Journal of nervous and mental disease.* 2003; 191:619–22.  
1266 doi: 10.1097/01.nmd.0000087190.09305.b6 PMID: 14504573.
- 1267 **248.** Sleath B, Tulskey JA, Peck BM, Thorpe J. Provider-patient communication about antidepressants  
1268 among veterans with mental health conditions. *Am J Geriatr Pharmacother.* 2007; 5:9–17.  
1269 doi: 10.1016/j.amjopharm.2007.03.002 PMID: 17608243.
- 1270 **249.** Malpass A, Kessler D, Sharp D, Shaw A. 'I didn't want her to panic': unvoiced patient agendas in  
1271 primary care consultations when consulting about antidepressants. *Br J Gen Pract.* 2011;  
1272 61:e63-71. doi: 10.3399/bjgp11X556218 PMID: 21276326.
- 1273 **250.** Ghods BK, Roter DL, Ford DE, Larson S, Arbelaez JJ, Cooper LA. Patient-physician  
1274 communication in the primary care visits of African Americans and whites with depression. *J*  
1275 *Gen Intern Med.* 2008; 23:600–6. Epub 2008/02/09. doi: 10.1007/s11606-008-0539-7 PMID:  
1276 18264834.

- 1277 **251.** Steffen A, Thom J, Jacobi F, Holstiege J, Bätzing J. Trends in prevalence of depression in  
1278 Germany between 2009 and 2017 based on nationwide ambulatory claims data. *J Affect Disord.*  
1279 2020; 271:239–47. Epub 2020/04/18. doi: 10.1016/j.jad.2020.03.082 PMID: 32479322.
- 1280 **252.** Domecq JP, Prutsky G, Elraiyah T, Wang Z, Nabhan M, Shippee N, et al. Patient engagement in  
1281 research: a systematic review. *BMC Health Serv Res.* 2014; 14:89. Epub 2014/02/26.  
1282 doi: 10.1186/1472-6963-14-89 PMID: 24568690.
- 1283 **253.** Gensichen J, Lukaschek K, Jung-Sievers C, Falkai P, Schmitt A, Henningsen P, et al. Predictors  
1284 and outcomes in primary depression care (POKAL) - a research training group develops an  
1285 innovative approach to collaborative care. *BMC Prim Care.* 2022; 23:309. Epub 2022/12/02.  
1286 doi: 10.1186/s12875-022-01913-6 PMID: 36460965.
- 1287 **254.** Chandra S, Ward P, Mohammadnezhad M. Factors Associated With Patient Satisfaction in  
1288 Outpatient Department of Suva Sub-divisional Health Center, Fiji, 2018: A Mixed Method Study.  
1289 *Front Public Health.* 2019; 7:183. Epub 2019/07/02. doi: 10.3389/fpubh.2019.00183 PMID:  
1290 31312630.
- 1291 **255.** Chang T-J, Bridges JFP, Bynum M, Jackson JW, Joseph JJ, Fischer MA, et al. Association Between  
1292 Patient-Clinician Relationships and Adherence to Antihypertensive Medications Among Black  
1293 Adults: An Observational Study Design. *J Am Heart Assoc.* 2021; 10:e019943. Epub 2021/07/09.  
1294 doi: 10.1161/JAHA.120.019943 PMID: 34238022.
- 1295 **256.** Guagliardo MF. Spatial accessibility of primary care: concepts, methods and challenges. *Int J*  
1296 *Health Geogr.* 2004; 3:3. Epub 2004/02/26. doi: 10.1186/1476-072X-3-3 PMID: 14987337.
- 1297 **257.** Härter M, Watzke B, Daubmann A, Wegscheider K, König H-H, Brettschneider C, et al.  
1298 Guideline-based stepped and collaborative care for patients with depression in a cluster-  
1299 randomised trial. *Sci Rep.* 2018; 8:9389. Epub 2018/06/20. doi: 10.1038/s41598-018-27470-6  
1300 PMID: 29925893.
- 1301 **258.** McCarron TL, Clement F, Rasiah J, Moran C, Moffat K, Gonzalez A, et al. Patients as partners in  
1302 health research: A scoping review. *Health Expect.* 2021; 24:1378–90. Epub 2021/06/21.  
1303 doi: 10.1111/hex.13272 PMID: 34153165.
- 1304 **259.** Baker R, Camosso-Stefinovic J, Gillies C, Shaw EJ, Cheater F, Flottorp S, et al. Tailored  
1305 interventions to address determinants of practice. *Cochrane Database Syst Rev.* 2015;  
1306 2015:CD005470. Epub 2015/04/29. doi: 10.1002/14651858.CD005470.pub3 PMID: 25923419.
- 1307

1308

1309 S 1 Appendix

1310

1311 S2 Preferred Reporting Items for Systematic reviews and Meta-Analyses extension for Scoping  
1312 Reviews (PRISMA-ScR) Checklist

1313

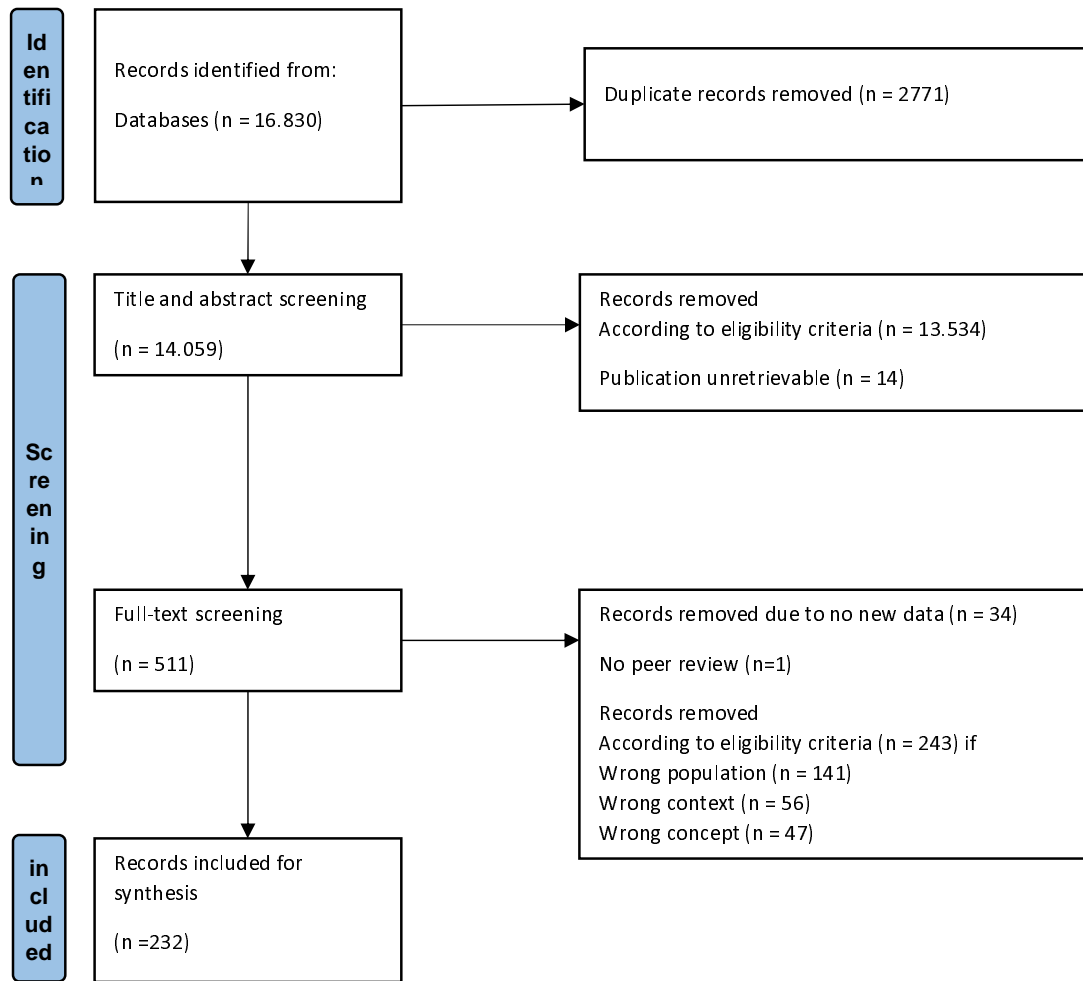

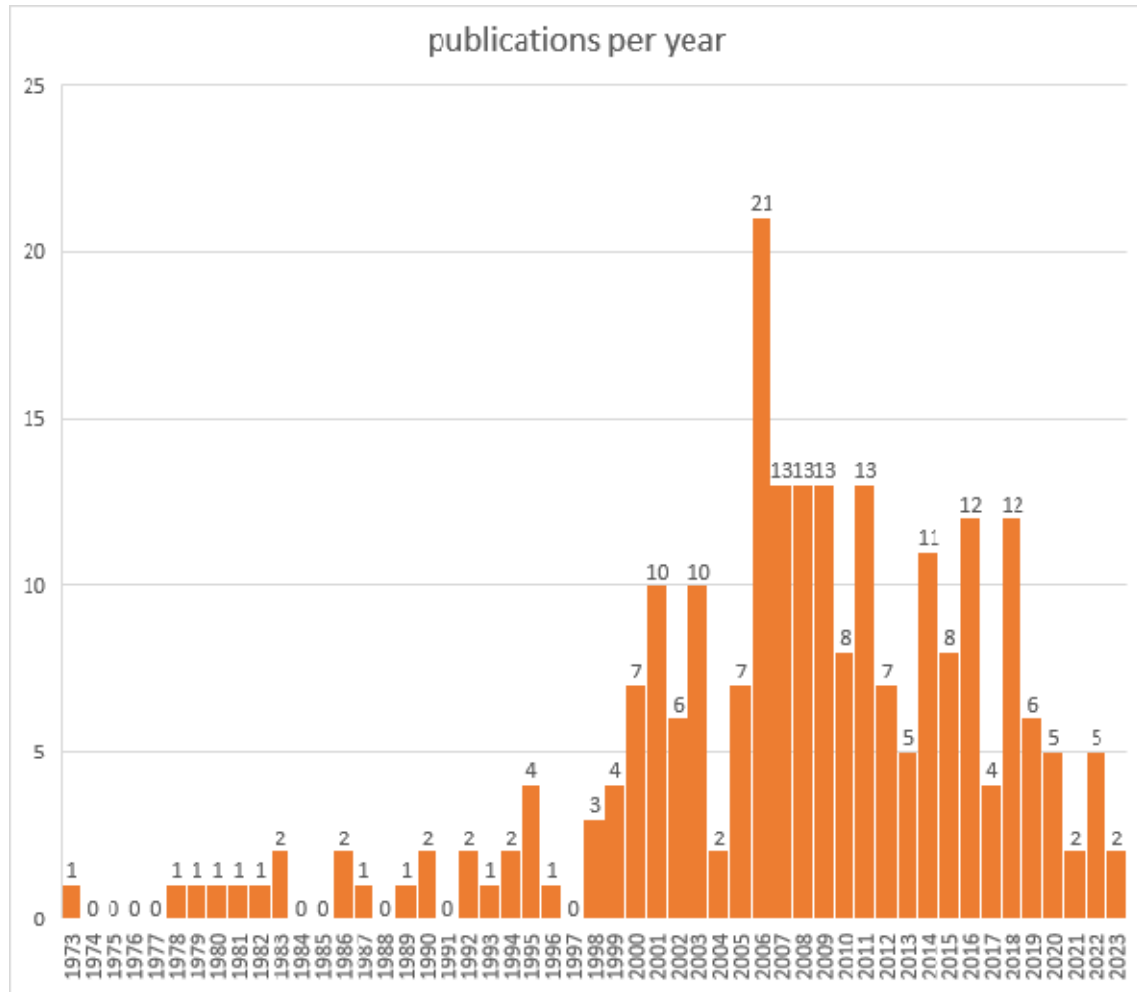



It is made available under a [CC-BY-ND 4.0 International license](https://creativecommons.org/licenses/by-nd/4.0/).

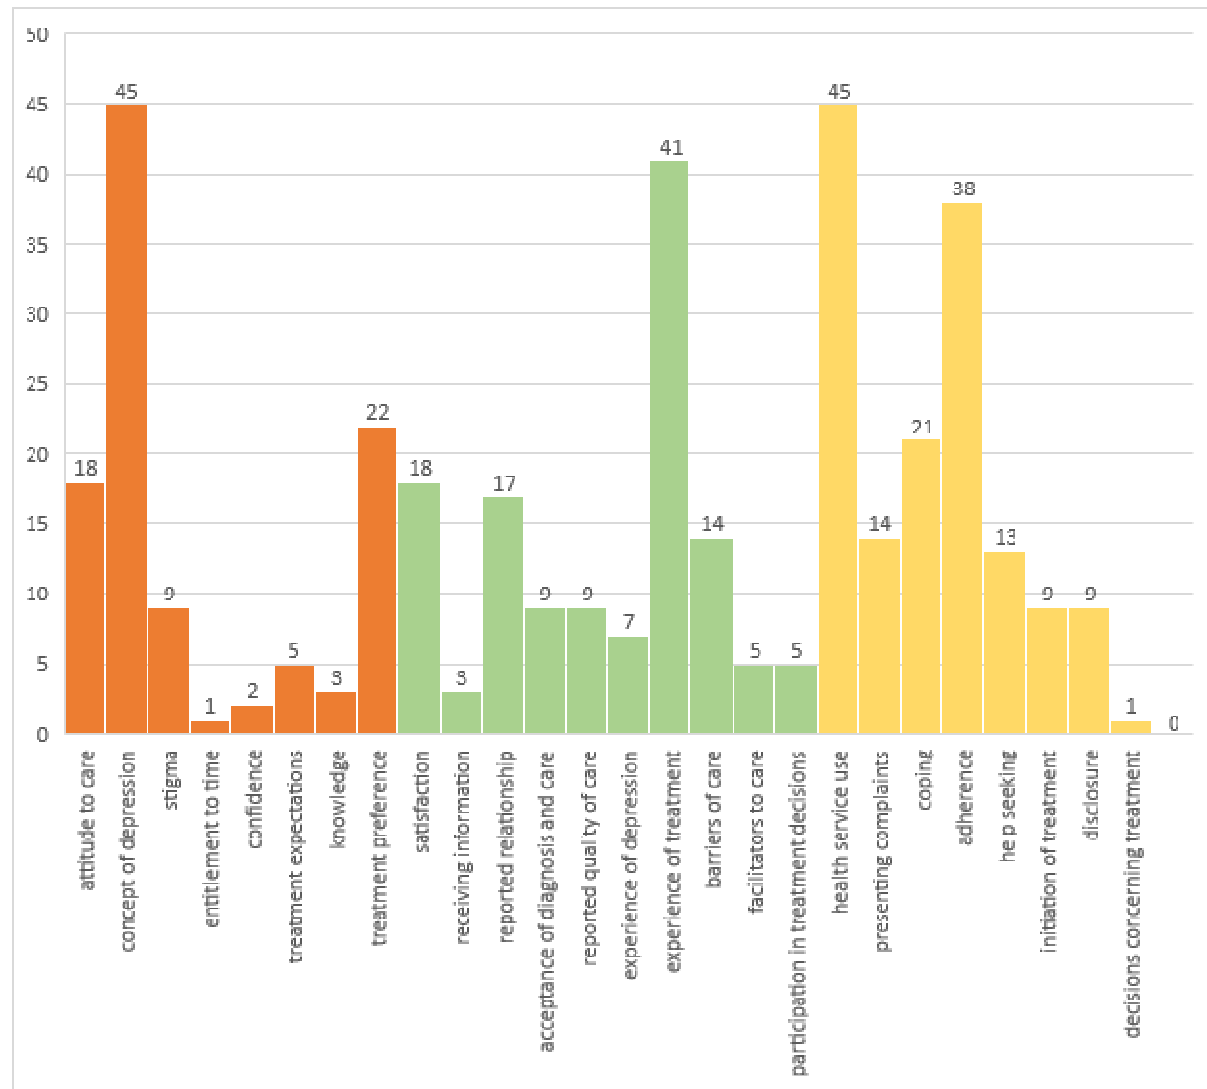

It is made available under a [CC-BY-ND 4.0 International license](https://creativecommons.org/licenses/by-nd/4.0/) .

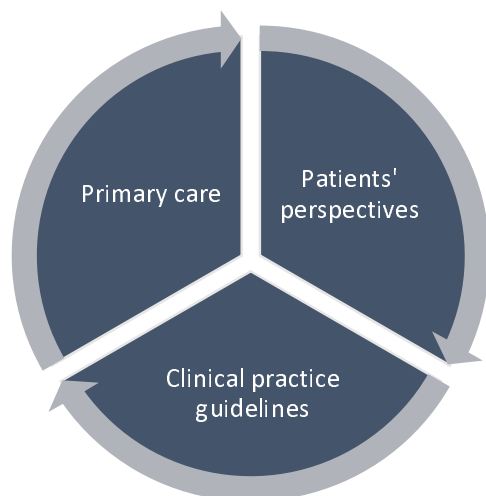

Source: https://medrxiv.org/content/medrxiv/early/2023/12/27/2023.12.27.23297265.full.pdf
